# Supplementary material for: Cellular TRIM33 restrains HIV-1 infection by targeting viral integrase for proteasomal degradation
Source: PubMed Central journal article supplement (PMC6389893; doi:10.1038/s41467-019-08810-0), 2019-02-25
Supplement: 41467_2019_8810_MOESM1_ESM.pdf [file 41467_2019_8810_MOESM1_ESM.pdf]

Ms. Ref. No.: NCOMMS-18-06181

**Cellular TRIM33 restrains HIV-1 infection by targeting viral integrase for proteasomal degradation**

*Hashim Ali<sup>1,5</sup>, Miguel Mano<sup>1,#</sup>, Luca Braga<sup>1,5</sup>, Asma Naseem<sup>2</sup>, Bruna Marini<sup>1,##</sup>, Diem My Vu<sup>1</sup>, Chiara Collesi<sup>1,4</sup>, Germana Meroni<sup>3</sup>, Marina Lusic<sup>1,###</sup> and Mauro Giacca<sup>1,4,5</sup>*

*<sup>1</sup>Molecular Medicine Laboratory, International Centre for Genetic Engineering and Biotechnology (ICGEB), Padriciano 99, 34149 Trieste, Italy*

*<sup>2</sup>Cellular Immunology Laboratory, International Centre for Genetic Engineering and Biotechnology (ICGEB), Padriciano 99, 34149 Trieste, Italy*

*<sup>3</sup> Department of Life Sciences, University of Trieste, 34127 Trieste, Italy*

*<sup>4</sup> Department of Medical, Surgical and Health Sciences, University of Trieste, 34127 Trieste, Italy*

*<sup>5</sup> Department of Cardiovascular Medicine & Sciences, King's College London, The James Black Centre, 125 Coldharbour Lane, London SE5 9N, UK*

**SUPPLEMENTARY FIGURES AND TABLES**

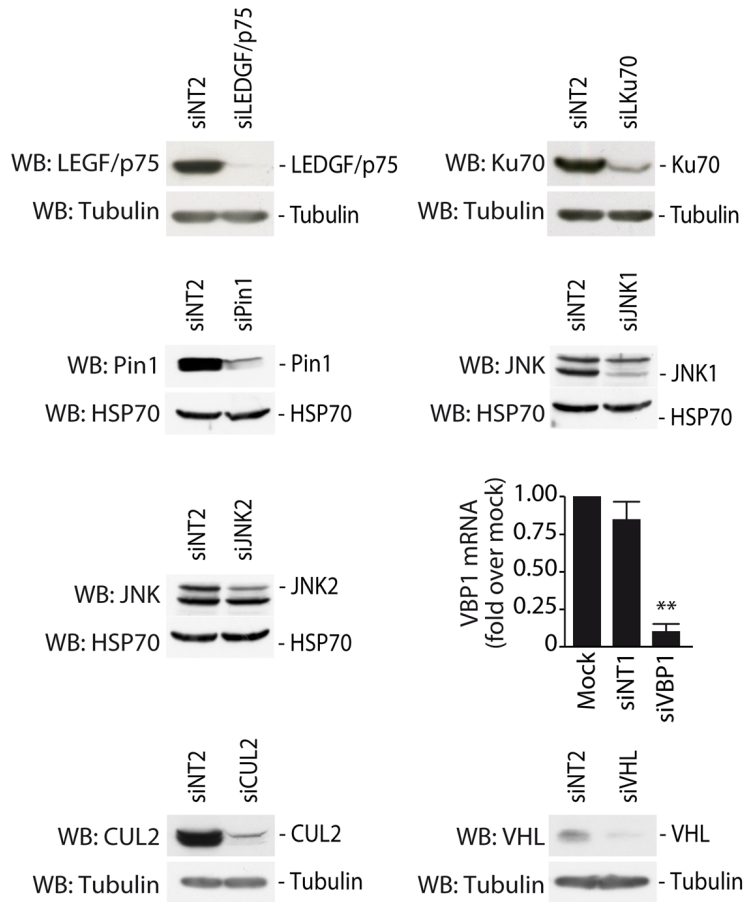

**Supplementary Figure 1. Efficient knock-down of selected cellular proteins after RNAi.** Amount of LEDGF/p75, Ku70, Pin1, JNK1, JNK2, Cul2, VHL by immunoblotting and of VBP1 mRNA by real-time RT-PCR after cells treatment with the respective siRNAs.

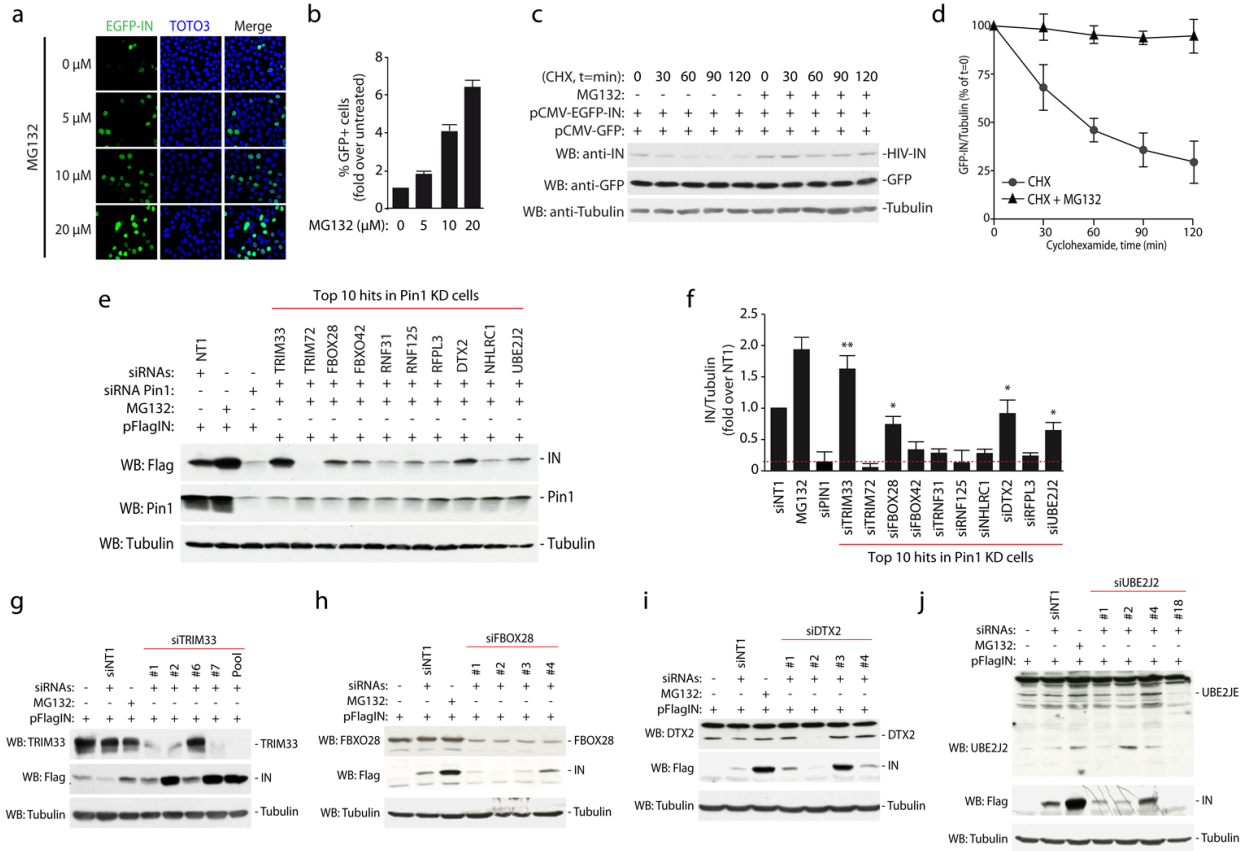

**Supplementary Figure 2. Cellular TRIM33 E3 ligase determines degradation of HIV-1 integrase**

**a.** Fusion to the EGFP protein does not interfere with the dynamics of HIV-1 IN degradation. HeLa cells were transfected with a plasmid expressing EGFP-IN and, after 48 hr, treated with the proteasome inhibitor MG132 for 5 hr at the indicated concentrations. Cells were then washed with 1XPBS; TOTO3 was used to stain nuclei and IN levels were examined by high content microscopy assessing the number of GFP+ cells.

**b.** Percentage of GFP+ cells, a surrogate for IN stability, at the indicated concentrations of MG132.

**c.** Measurement of EGFP-IN stability. EGFP-IN-expressing HeLa cells were treated with CHX (30 μg/ml) with or without MG132, followed by protein detection at different time points using an anti-IN antibody. Tubulin levels served as a loading control and GFP levels as a transfection and specificity control.

**d.** Quantification of EGFP-IN protein levels in the presence and absence of MG132 in CHX-treated cells at the indicated time points. Data are mean±SEM; n=3 independent experiments.

**e.** Representative immunoblot showing the levels of HIV-IN after knock-down of the top 10 E3 ligases from the screening together with an anti-Pin1 siRNA. HeLa cells were transfected with siRNAs against the indicated factors together with an siRNA against Pin1, followed by transfection of Flag-IN. Forty-eight hr later the levels of IN were assessed by anti-Flag immunoblotting. Tubulin served as a loading control.

**f.** Quantification of the levels of HIV-1 IN after knock-down of the top 10 E3 ligases identified by the screening together with the anti-Pin1 siRNA. Experiments were performed as in panel e. IN levels are expressed after normalization for tubulin and as fold over siNT1. Data are mean±SEM; n=3 independent experiments; \*P<0.05; \*\*P<0.01; one-way ANOVA.

**g.** Effect of anti-TRIM33 siRNAs. The immunoblots show the levels of endogenous TRIM33 and transfected Flag-IN in HeLa cells treated with anti-TRIM33 siRNA pool (Pool), as used for the screening, its deconvoluted siRNAs (#1, #2, #6 and #7), or non-targeting siRNA-1 (siNT1). MG132 was used to assess the effect of inhibiting proteasome-mediated protein degradation.

**h-j.** Same as in panel g for FBOX28, DTX2 and UBE2J2 respectively.

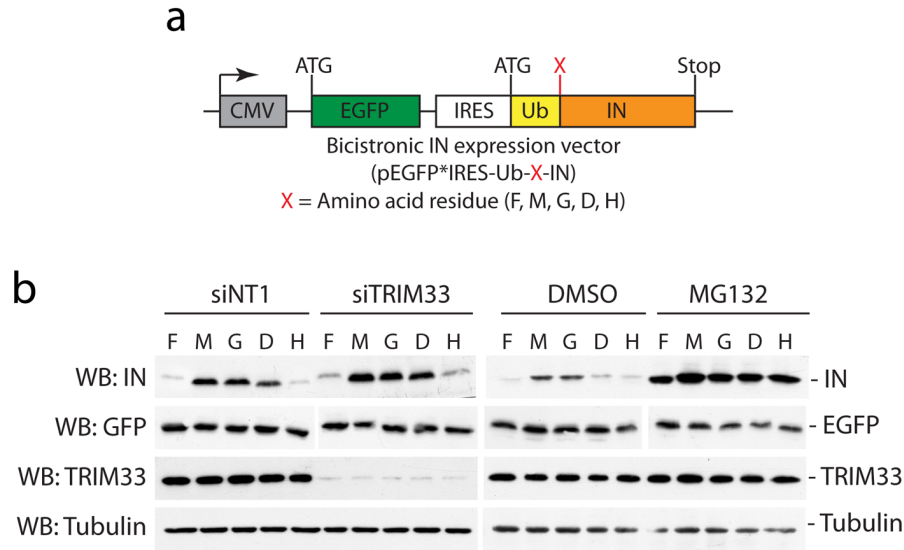

**Supplementary Figure 3. TRIM33 is not involved in integrase degradation through the N-end rule pathway**

**a.** Schematic representation of a bicistronic expression vector in which IN is expressed from as a fusion to an ubiquitin monomeric moiety immediately adjacent to its N-terminal amino acid<sup>3</sup>. The Ub-X-IN fusion protein is then co-translationally cleaved by the cell at the Ub-protein junction, thus producing IN with a desired residue (“X”) at the N terminus of the protein<sup>82</sup>.

**b.** Silencing of TRIM33 increases protein levels of IN N-terminal variants. HeLa cells were transfected with an siRNAs against TRIM33, followed by transfection of bicistronic plasmids expressing IN carrying a different N-terminal residue (F: phenylalanine, M: methionine, G: glycine, D: aspartic acid, H: histidine). The levels of IN were assessed 48 hr later by anti-Flag immunoblotting. Tubulin served as a loading control and EGFP levels as transfection control. The results shown is representative of three different experiments.

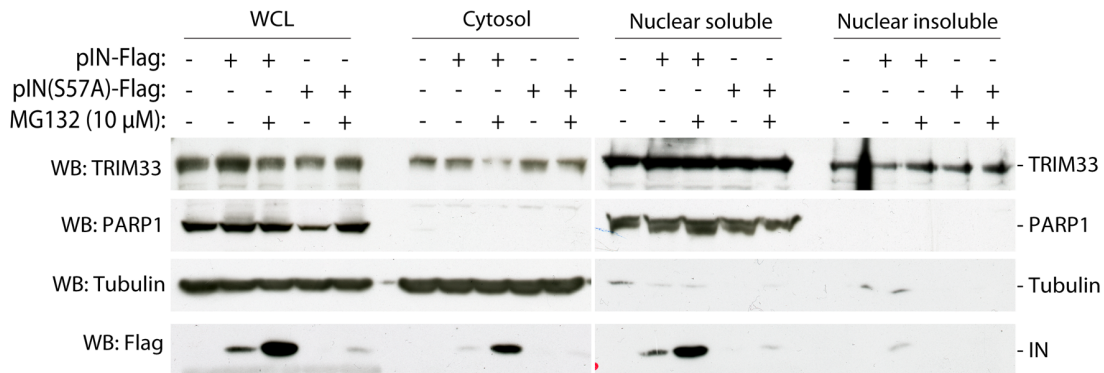

**Supplementary Figure 4. TRIM33 is localized in both nucleus and cytoplasm.**

Subcellular fractionation of HeLa cells transfected with wild type and S57A mutant in the presence or absence of proteasome inhibitor. Fractionated proteins were resolved on 10% SDS-PAGE gels before western blotting, Flag-IN and TRIM33 subcellular distribution was examined by indicated antibodies. Subcellular markers were Tubulin for the cytosolic fraction and PARP1 for the nuclear fraction.



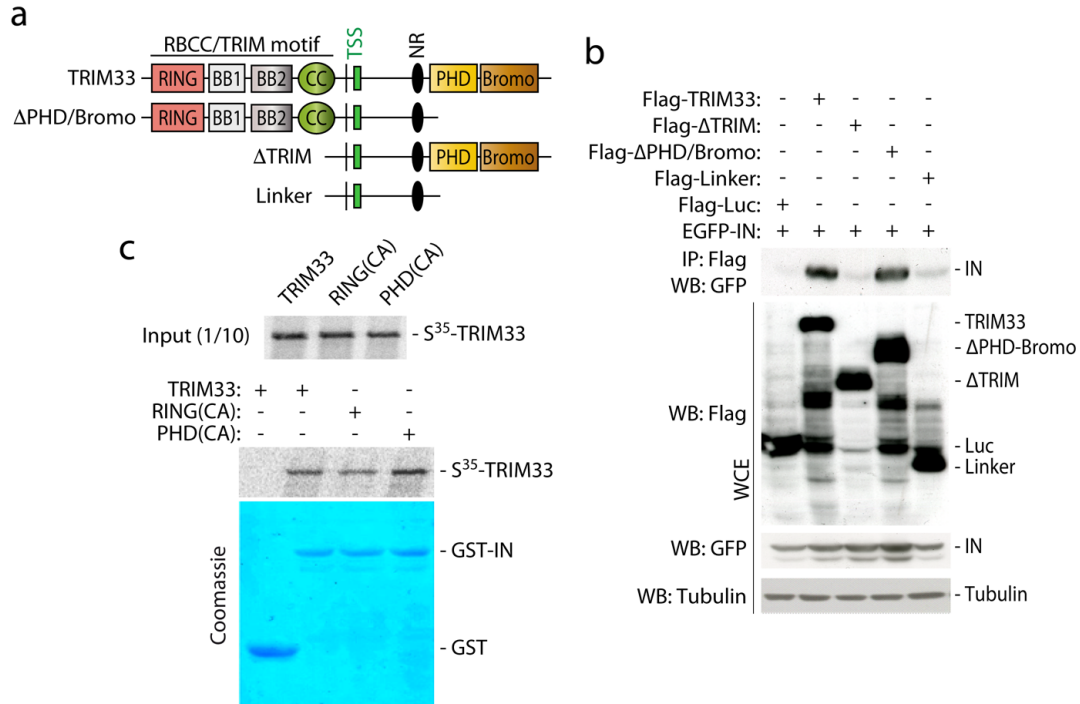

**Supplementary Figure 6. TRIM33 inhibits viral replication by promoting degradation of viral integrase via poly-ubiquitination**

**a.** Schematic representation of Flag-tagged TRIM33 and its deletion mutants.

**b.** The TRIM domain of TRIM33 is essential for binding HIV-1 IN. HEK 293T cells transfected with plasmids encoding Flag-TRIM33 and its truncated variants or Flag-luciferase together with EGFP-IN were immunoprecipitated with anti-Flag M2 beads and immunoblotted with an anti-GFP antibody. Whole cell extracts (WCE) were run on an SDS-PAGE gel and immunoblotted with anti-GFP, anti-Flag and anti-Tubulin antibodies to verify the amounts of expressed/loaded proteins.

**c.** Point mutations in TRIM33 RING and PHD domains do not alter binding to IN. In vitro translated, S<sup>35</sup>-labeled TRIM33 and its mutants RING(C125A/C128A) and PHD(C901A/C902A/C905A) - RING(CA) and PHD(CA) respectively - were incubated with recombinant GST-IN or GST; binding was analyzed by phosphoimaging as in Fig. 4c. The top part of the figure shows the input levels of the three in vitro translated proteins used for the binding assays.

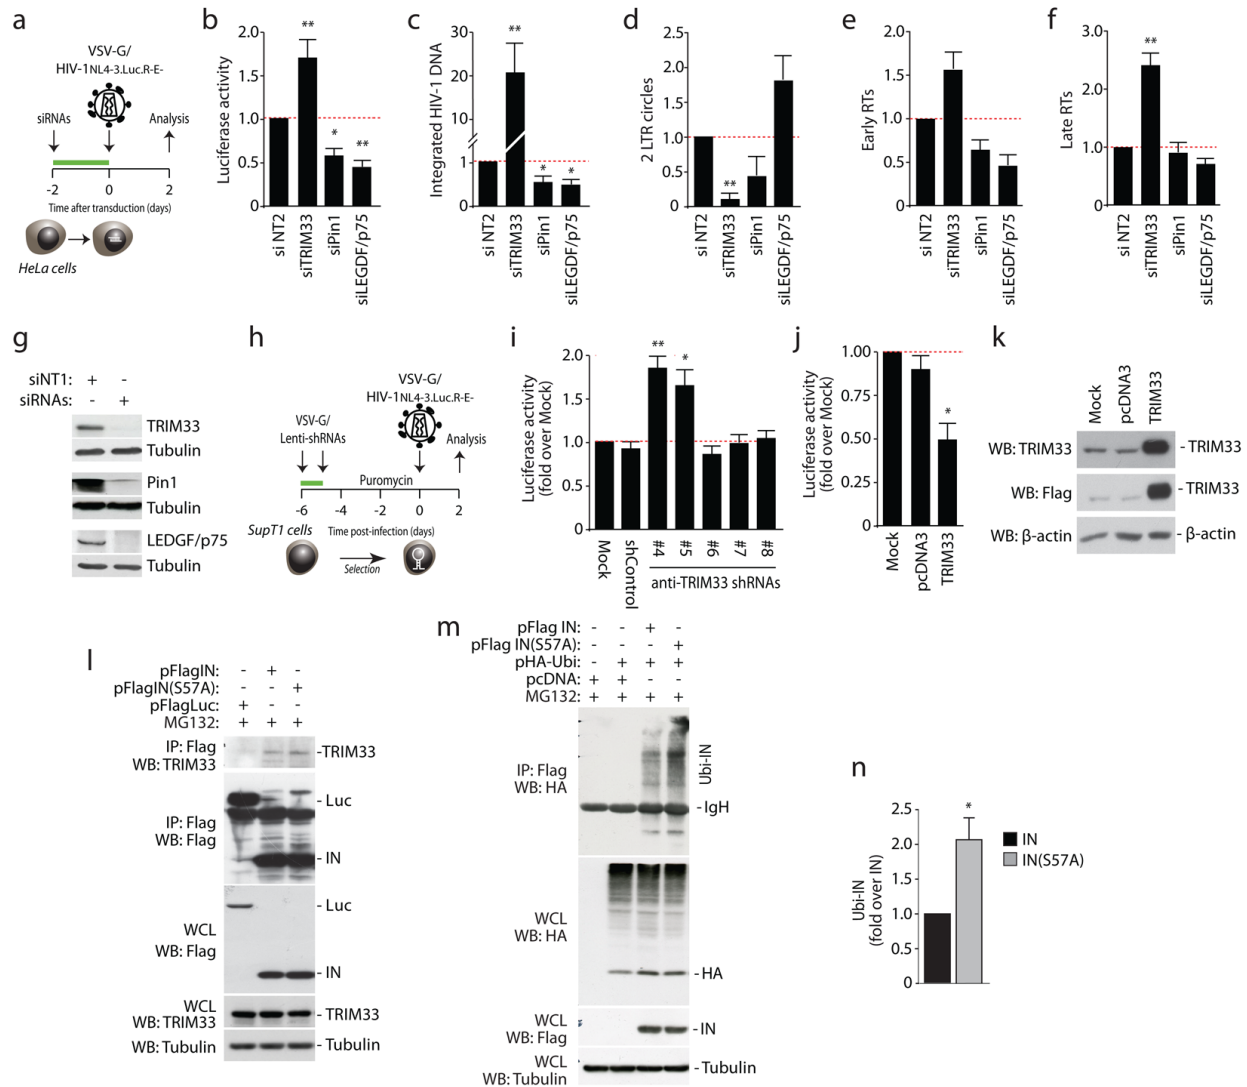

**Supplementary Figure 7. TRIM33 knock down enhances viral infection**

**a.** Transient silencing of TRIM33 enhances HIV-1 infection. HeLa cells were first transfected with siRNAs against TRIM33, Pin1, LEDGF/p75 or a control non-targeting siRNA (siNT2) and then infected with VSV-G-pseudotyped HIV-1<sub>NL4-3.Luc.R-E</sub> molecular clone, followed by analysis of luciferase and of levels of DNA integration.

**b.** Results of luciferase assays after knockdown of the indicated factors. Data are mean±SEM; n=3 independent experiments; \*P<0.05; \*\*P<0.01; one-way ANOVA.

**c-f.** Levels of integrated DNA (c), 2 LTR circles (d), early and late reverse transcripts (RT; e and f respectively) after knockdown of the indicated factors. DNA quantification results were normalized over the levels of the B13 single-copy cellular gene <sup>77</sup>. Data are mean±SEM; n=3 or more independent experiments; \*P<0.05; \*\*P<0.01; one-way ANOVA

**g.** Western blot showing protein levels for Pin1, LEDGF/p75 and TRIM33 in infected cells transfected with the respective siRNAs.

**h.** Scheme of procedure to assess the effect of stable knockdown of TRIM33 in single round HIV-1 infection. SupT1 cells were transduced with one of five lentiviral vectors expressing different shRNAs against TRIM33 (#4,



#5, #6, #7, and #8) or a control, non-targeting shRNA. Forty-eight hr after infection, cells were grown in puromycin-containing medium to selected transduced cells. After four additional days, cells with infected with VSV-G-pseudotyped HIV-1<sub>NL4-3.Luc.R-E-</sub> and analysed for luciferase activity at day 2 after infection.

**i.** Luciferase activity in SupT1 cells transduced with lentiviral vectors expressing the indicated shRNAs. Data are mean±SEM; n=3 independent experiments; \* $P < 0.05$ ; \*\* $P < 0.01$ ; one-way ANOVA.

**j.** Luciferase activity in cells transfected with an expression vector for TRIM33 and infected with VSVG-/HIV-1<sub>NL4-3.Luc.R-E-</sub>.

**k.** Western blotting showing the levels of expression of TRIM33 in transfected cells.

**l.** Endogenous TRIM33 interacts with both wild type IN and the IN(S57A) mutant in vivo. In the upper picture, HEK293T cells were transfected with wild type IN-, mutant IN(S57A)-, and luciferase expressing plasmids; lysates were then immunoprecipitated with anti-Flag M2 beads and immunoblotted with anti-TRIM33 antibody. The lower three pictures show control immunoblottings with the indicated antibodies to monitored the expression levels of the indicated proteins in whole cell lysates (WCL). The blot is representative of at least three experiments showing consistent results.

**m.** Representative immunoblotting showing the levels of poly-ubiquitination of wild type IN and the IN(S57A) mutant. HEK293T cells were transfected with combinations of HA-ubiquitin, Flag-IN or Flag-IN(S57A). Cells were harvested after 5 hr treatment with MG132 and immunoprecipitated with anti-Flag M2 beads. Ubiquitin-conjugated IN (Ubi-IN) was detected by immunoblotting with anti-HA antibody (upper picture). The lower pictures show the expression of the transfected proteins in whole cell lysates (WCL) after immunoblotting with the indicated antibodies.

**n.** Quantification of the levels of ubiquitination of IN and IN(S57A). Experiments were performed as in panel e. Data are mean±SEM; n=3 independent experiments; \* $P < 0.05$ ; t-test.

**Supplementary Figure 8/1 - 8/7 (next 7 pages). Original source blots for the panels shown in the main manuscript and supplementary figures.** The portion of the image that is displayed is boxed with a dotted red line.



Fig.1b FlagIN (HIV-1)

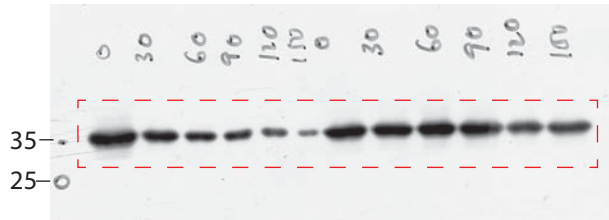

Fig.1b EGFP

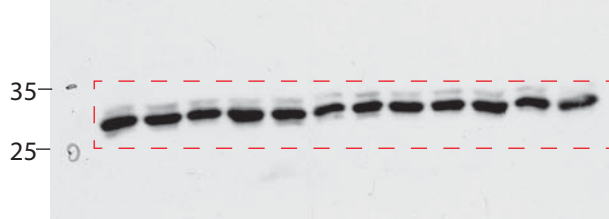

Fig.1b Tubulin

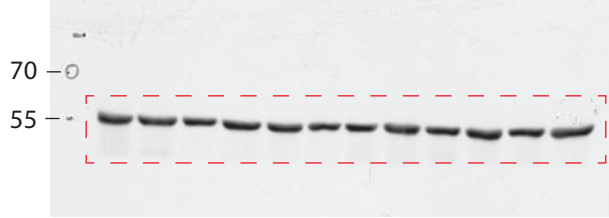

Fig.1e FlagIN (MLV)

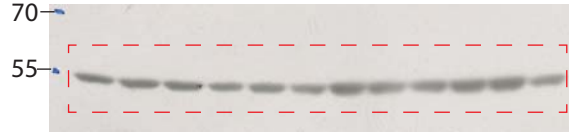

Fig.1e EGFP

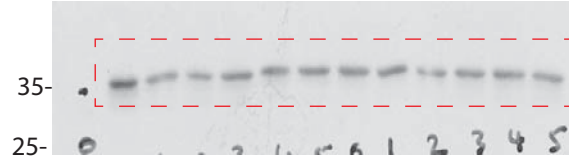

Fig.1e Tubulin

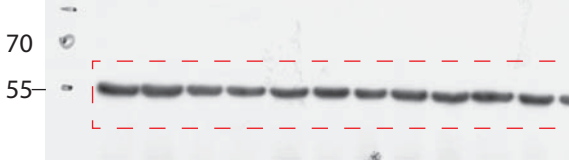

Fig.1h FlagIN (HIV-1)

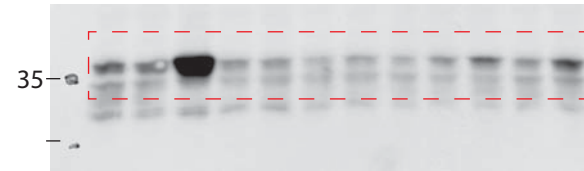

Fig.1h Tubulin

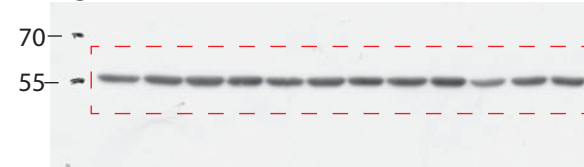

Fig.1h EGFP

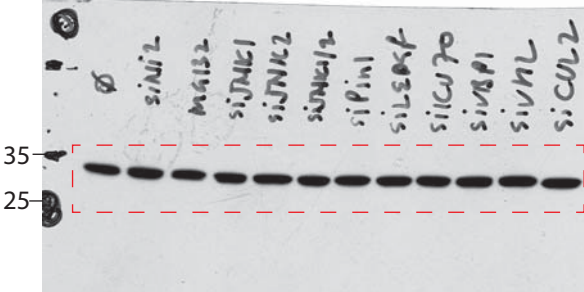

Suppl. Fig. 1

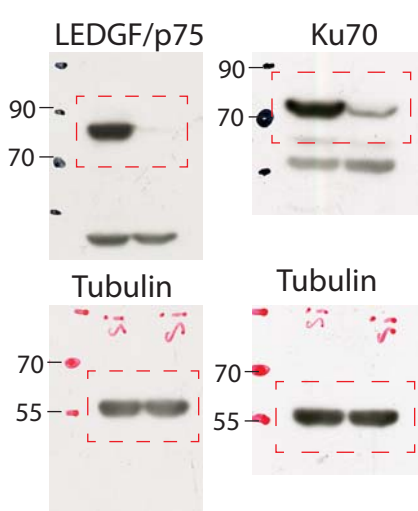

Suppl. Fig. 1

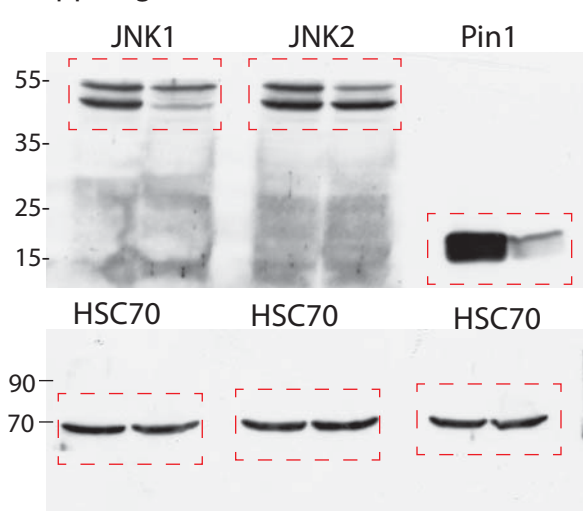

Suppl. Fig. 1

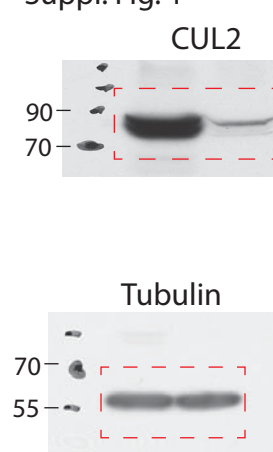

Suppl. Fig. 1

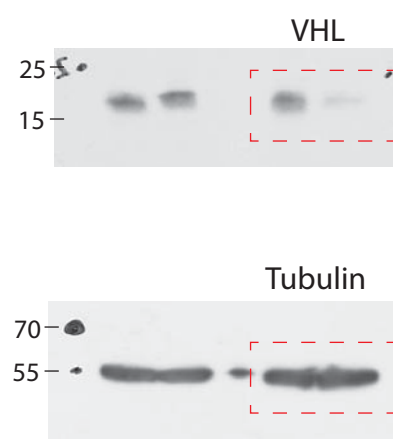

Fig.2c

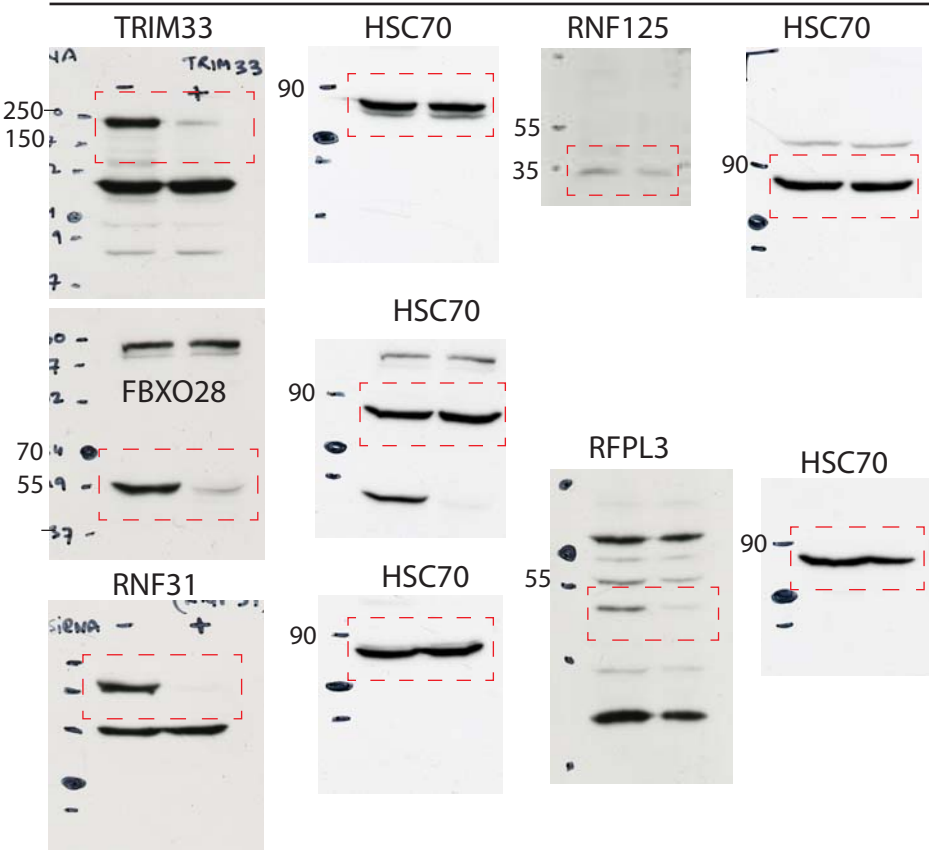

Fig.2d FlagIN (HIV-1)

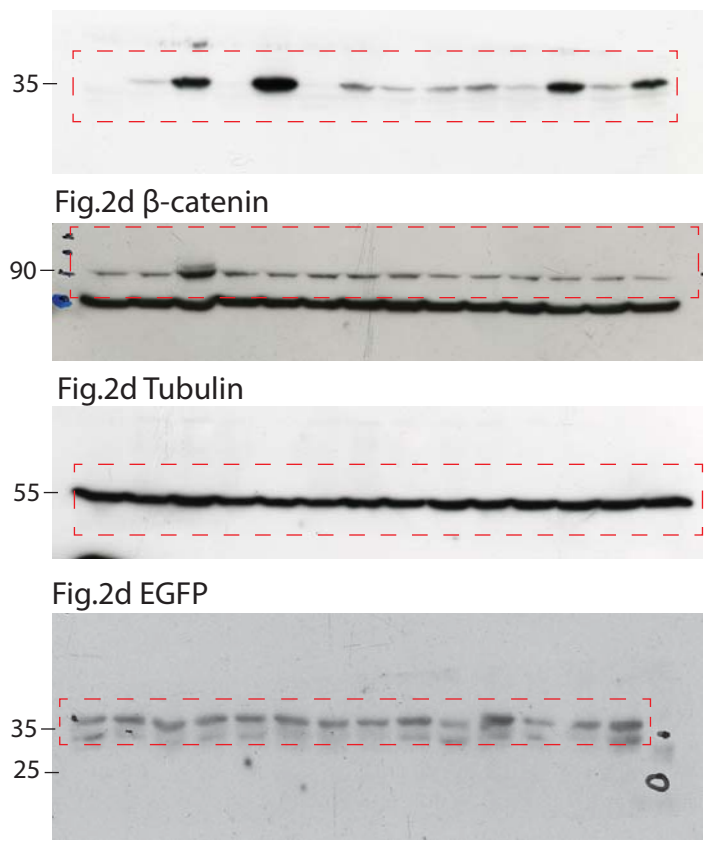

Suppl.Fig.2c EGFP-IN

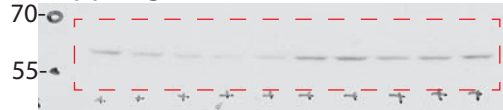

Suppl.Fig.2e FlagIN (HIV-1)

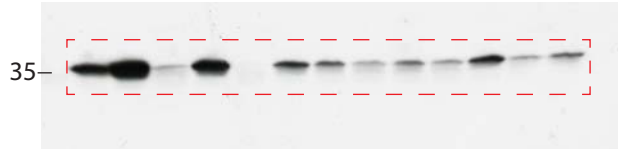

Suppl.Fig.2g TRIM33

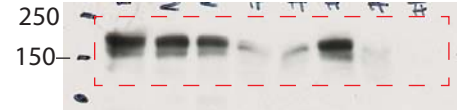

Suppl.Fig.2c Tubulin

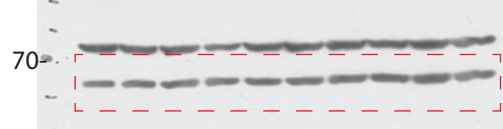

Suppl.Fig.2e Pin1

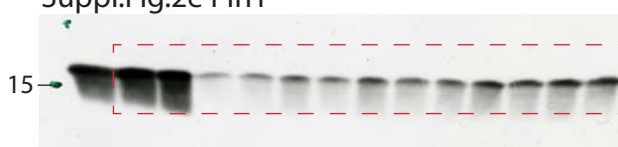

Suppl.Fig.2g FlagIN (HIV-1)

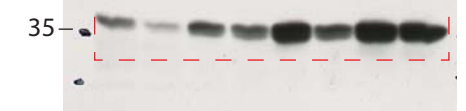

Suppl.Fig.2c GFP

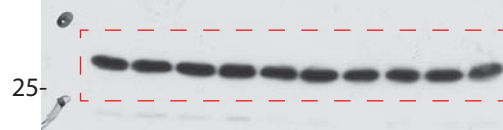

Suppl.Fig.2e Tubulin

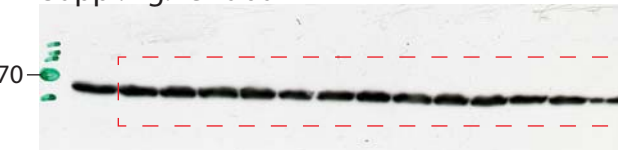

Suppl.Fig.2g Tubulin

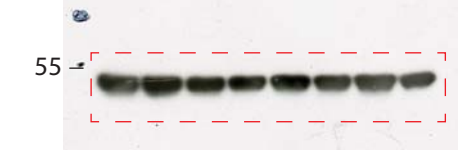

Suppl.Fig.2h FBXO28

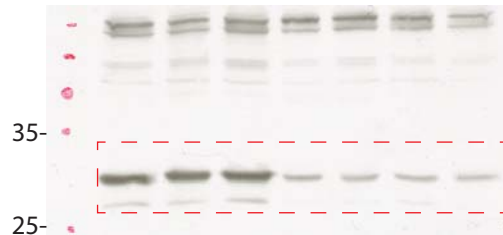

Suppl.Fig.2i DTX2

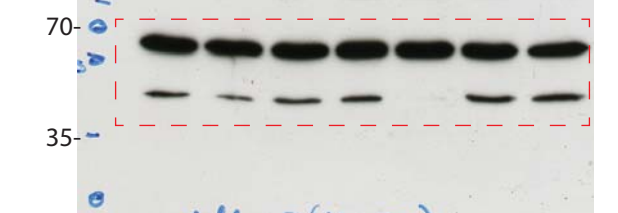

Suppl.Fig.2j UBE2J2

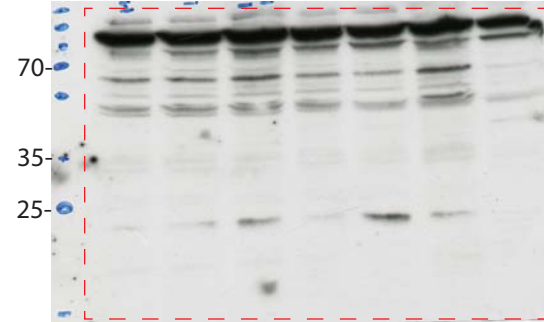

Suppl.Fig.2h FlagIN (HIV-1)

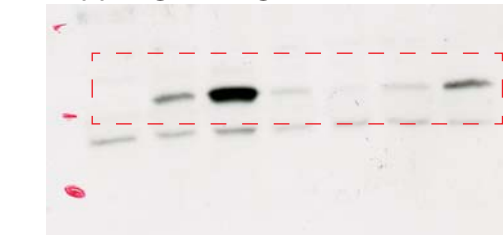

Suppl.Fig.2i FlagIN (HIV-1)

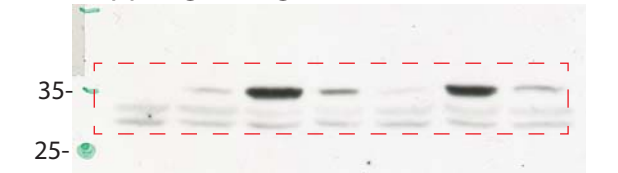

Suppl.Fig.2j FlagIN (HIV-1)

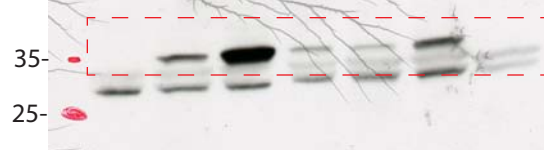

Suppl.Fig.2h HSC70

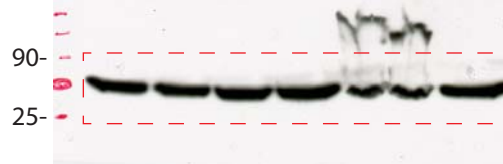

Suppl.Fig.2j HSC70

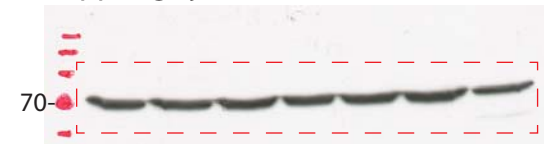

Fig.3b TRIM24

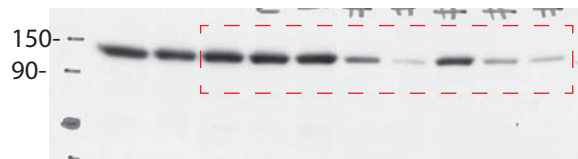

Fig.3b FlagIN (HIV-1)

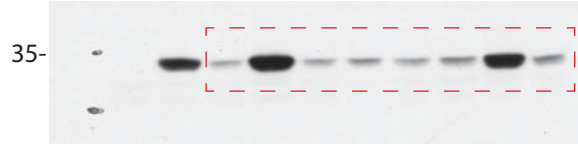

Fig.3b TRIM33

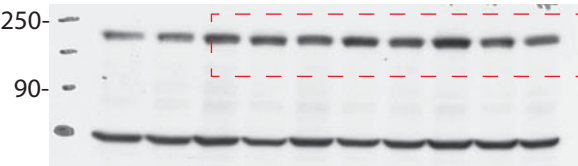

Fig.3b TRIM28

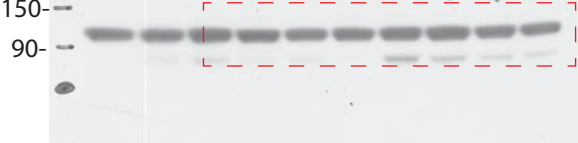

Fig.3b Tubulin

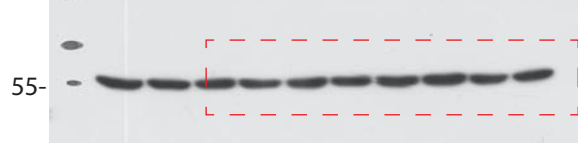

Fig.3c TRIM28

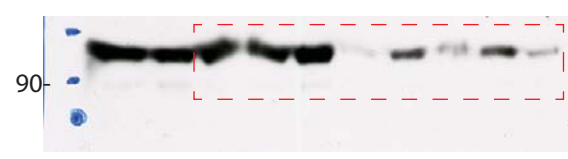

Fig.3c FlagIN (HIV-1IN)

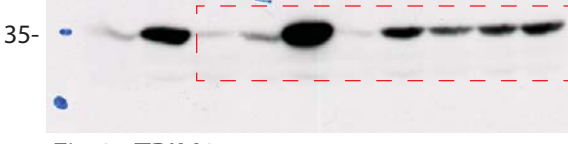

Fig.3c TRIM24

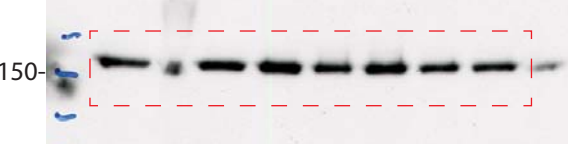

Fig.3c TRIM33

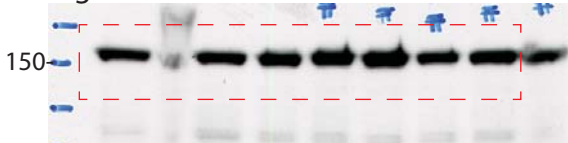

Fig.3c Tubulin

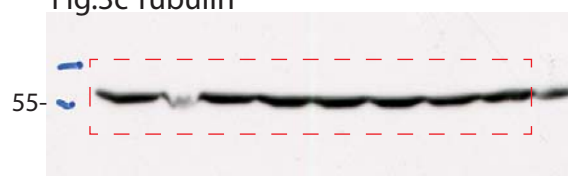

Fig.3d TRIM33

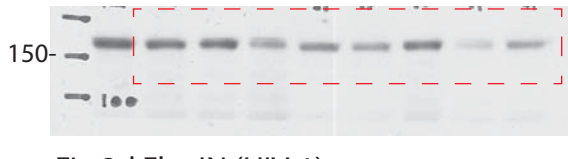

Fig.3d FlagIN (HIV-1)

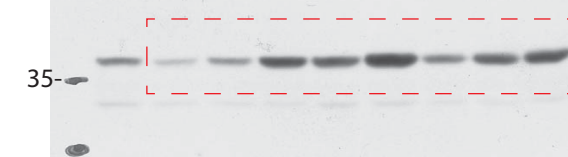

Fig.3d TRIM24

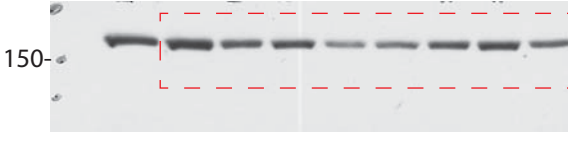

Fig.3d TRIM28

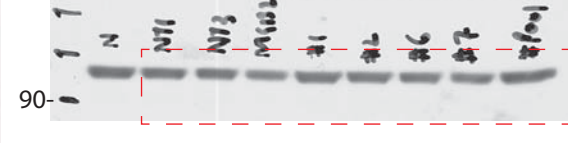

Fig.3d Tubulin

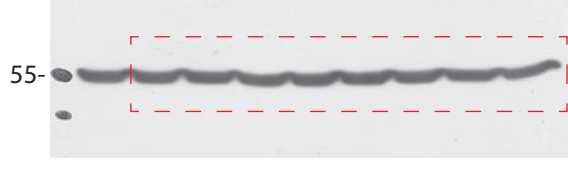

Fig.3e FlagIN (HIV-1)

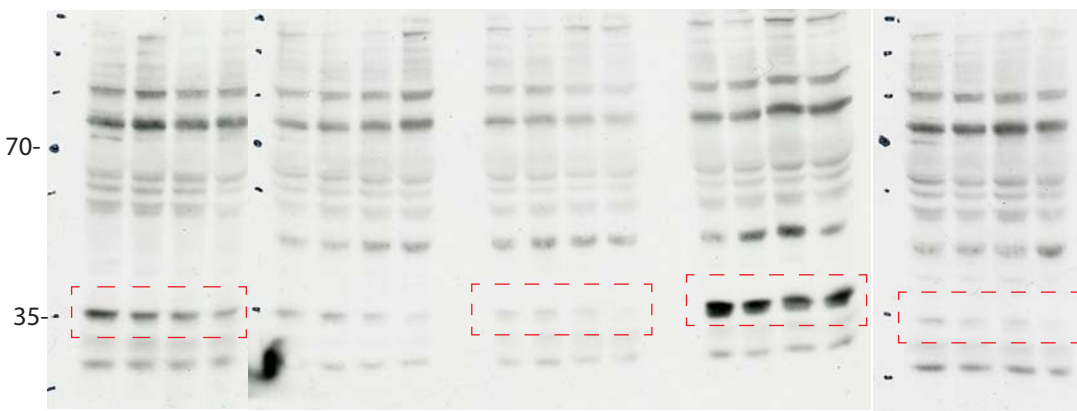

Fig.3e Tubulin

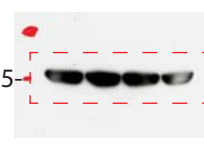

Fig.3e Tubulin

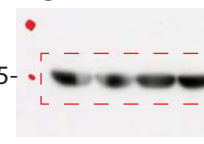

Fig.3e Tubulin

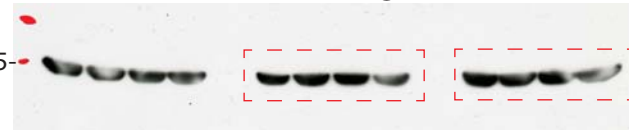

Fig.3g FlagIN (HIV)

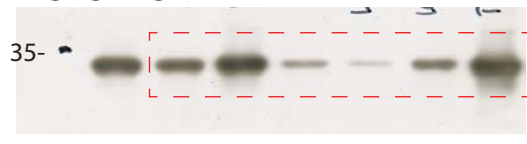

Fig.3g Tubulin

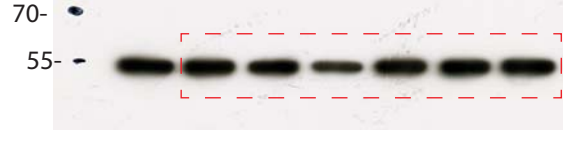

Fig.3g FlagIN (MLV)

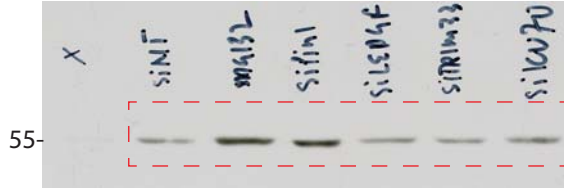

Fig.3g HSC70

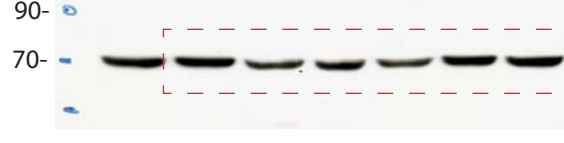

Suppl.Fig. 3b TRIM33

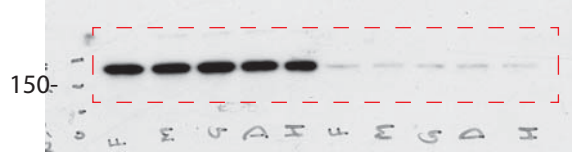

Suppl.Fig. 3b IN

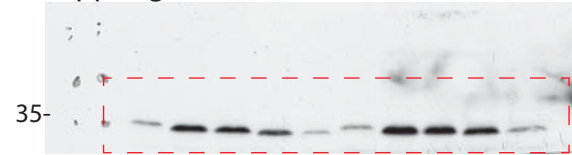

Suppl.Fig. 3b Tubulin

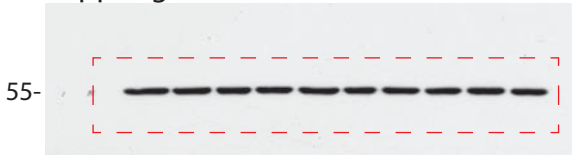

Suppl.Fig. 3b EGFP

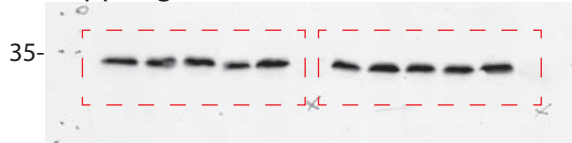

Suppl.Fig. 3b Tubulin and IN

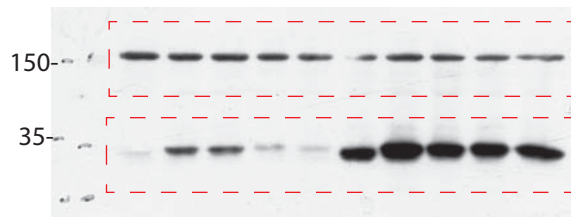

Suppl.Fig. 3b TRIM33

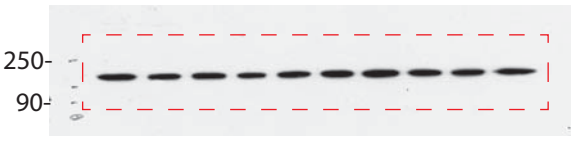

Suppl.Fig. 3b EGFP

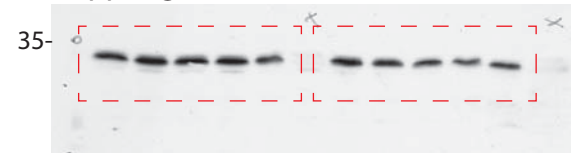



Fig.4a TRIM33

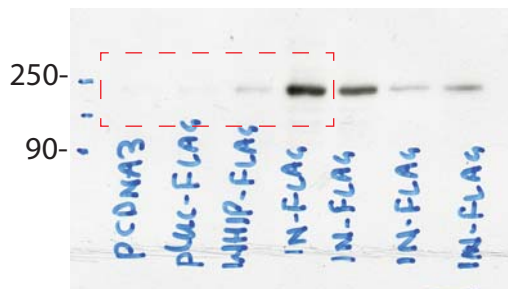

Fig.4a WHIP and Luc

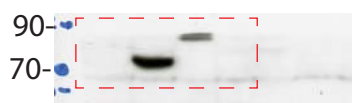

Fig.4a TRIM33

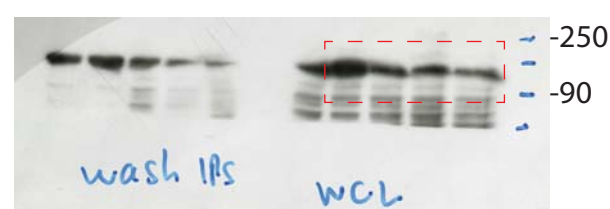

Fig.4a FlagIN

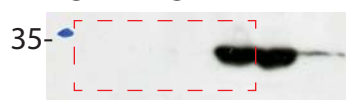

Fig.4d Ubiquitin

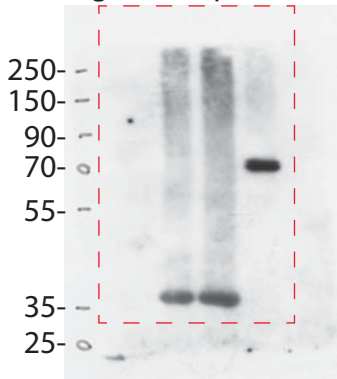

Fig.4d K48

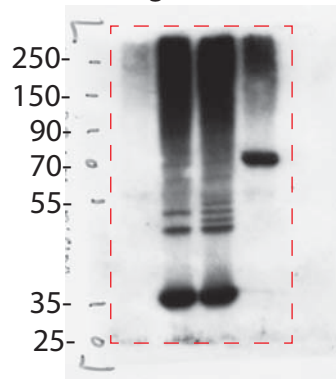

Fig.4d K63

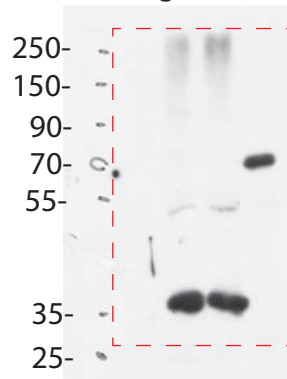

Fig.4d Flag

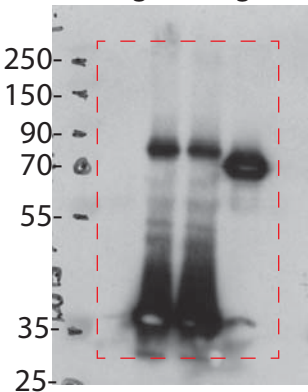

Fig.4d HA

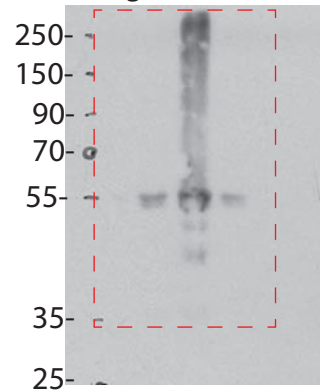

Fig.4e IN

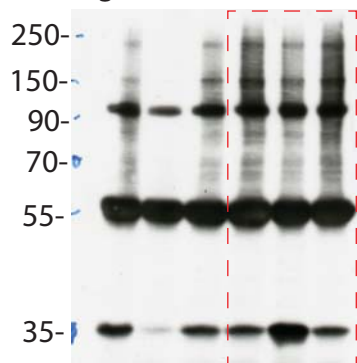

Suppl. Fig.4 TRIM33

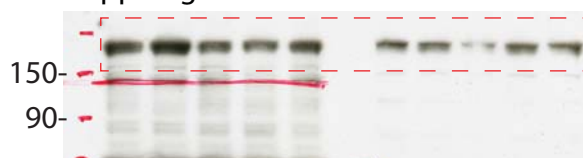

Suppl. Fig.4 TRIM33

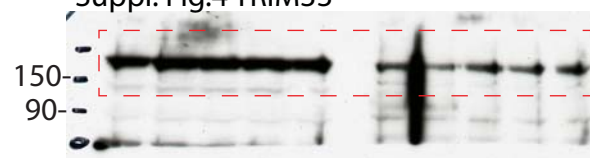

Suppl. Fig.4 PARP1

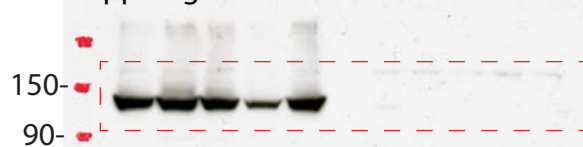

Suppl. Fig.4 PARP1

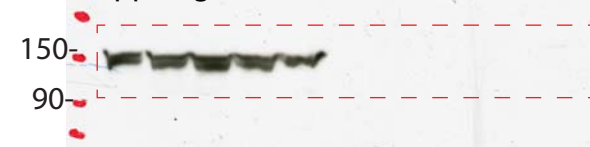

Suppl. Fig.4 Tubulin

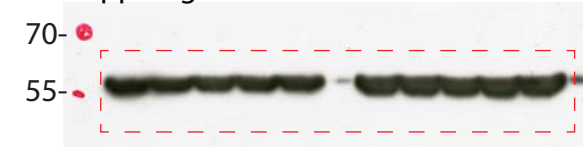

Suppl. Fig.4 Tubulin

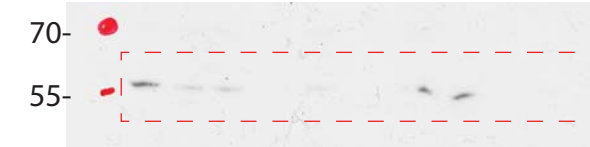

Suppl. Fig.4 FlagIN

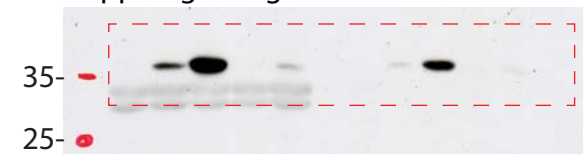

Suppl. Fig.4 FlagIN

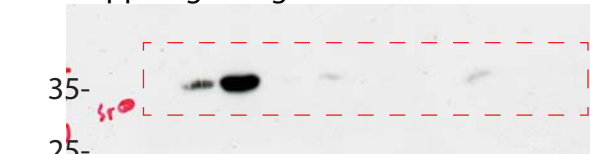

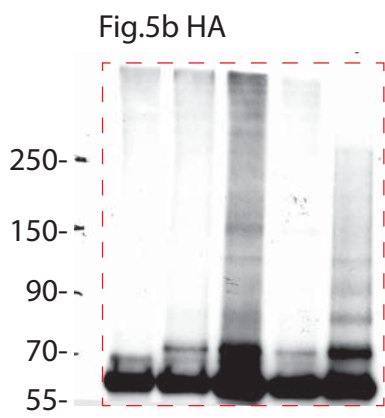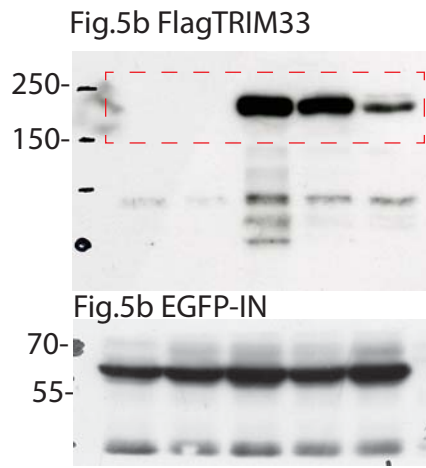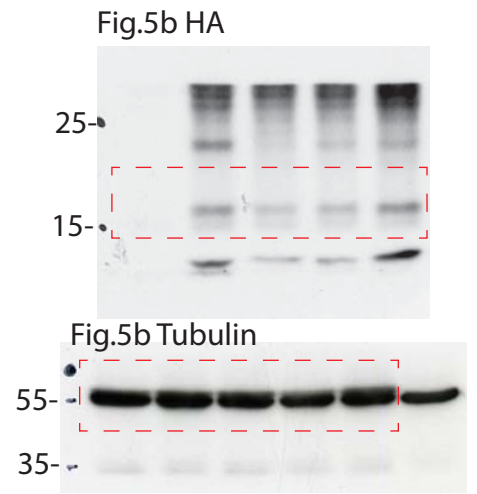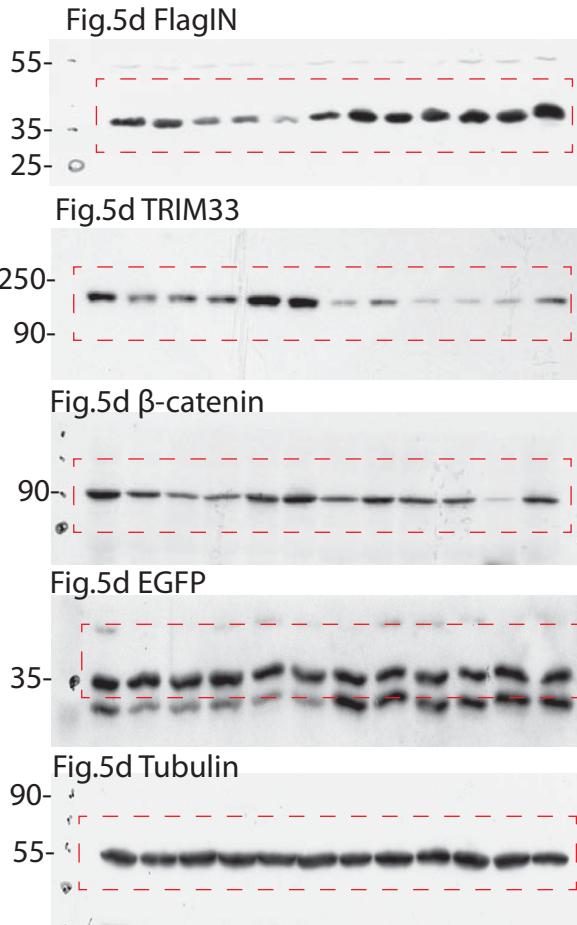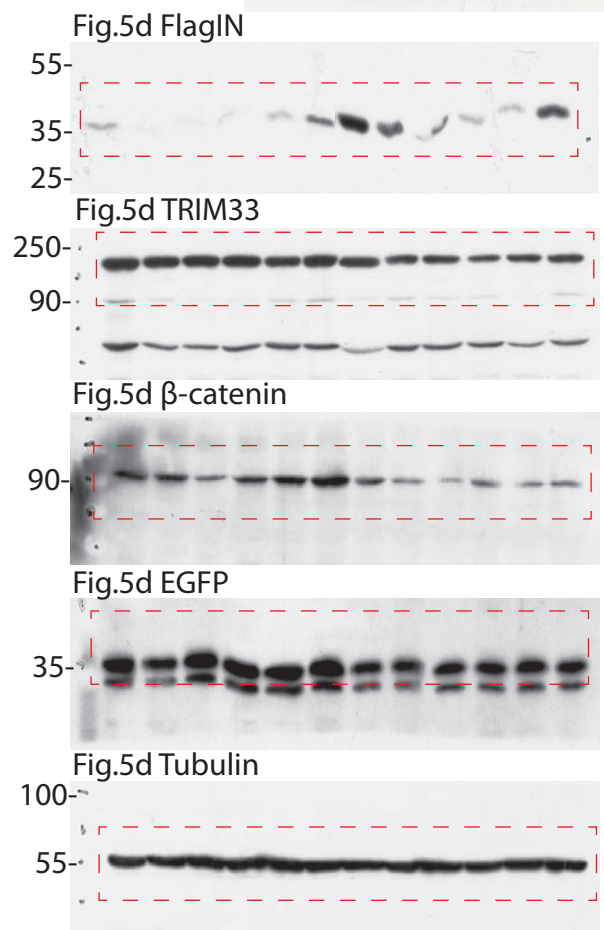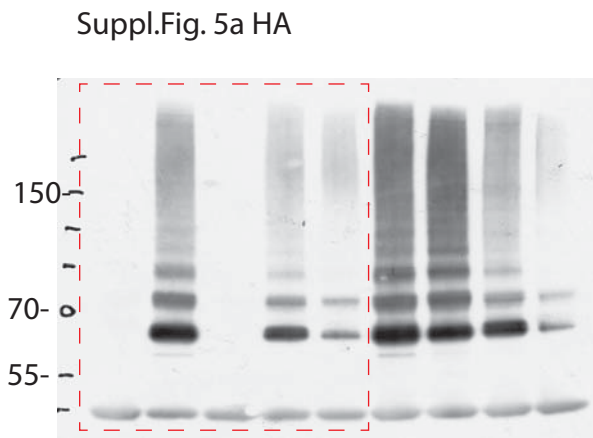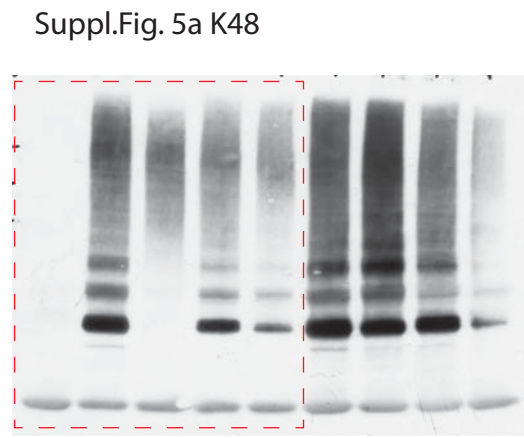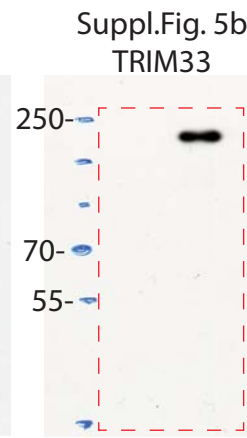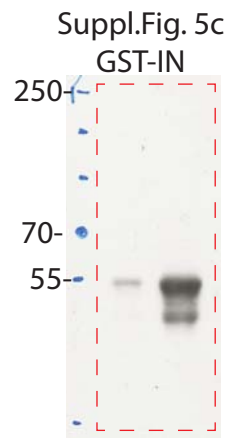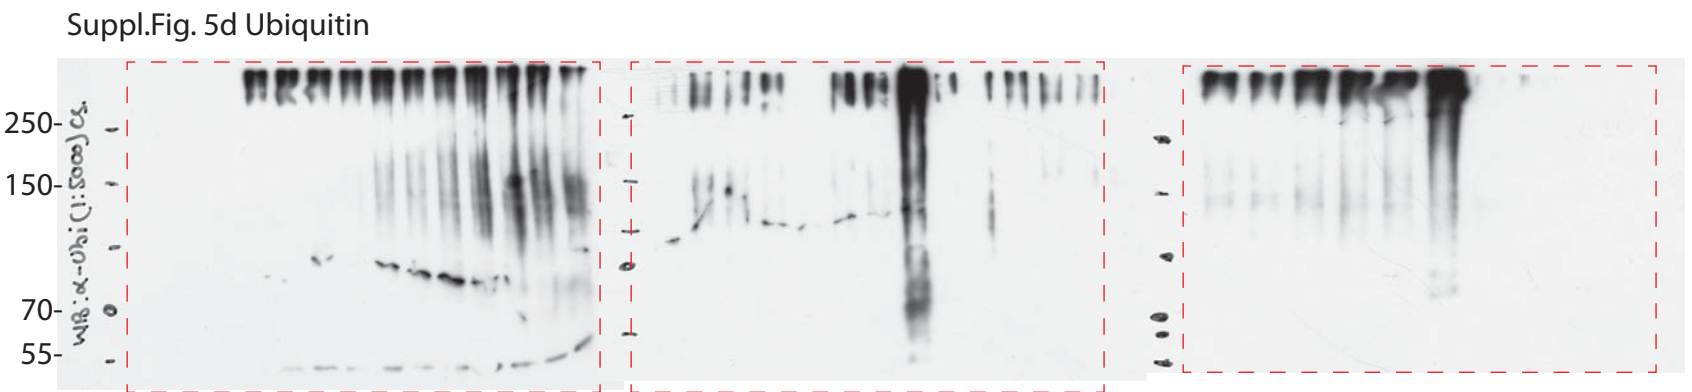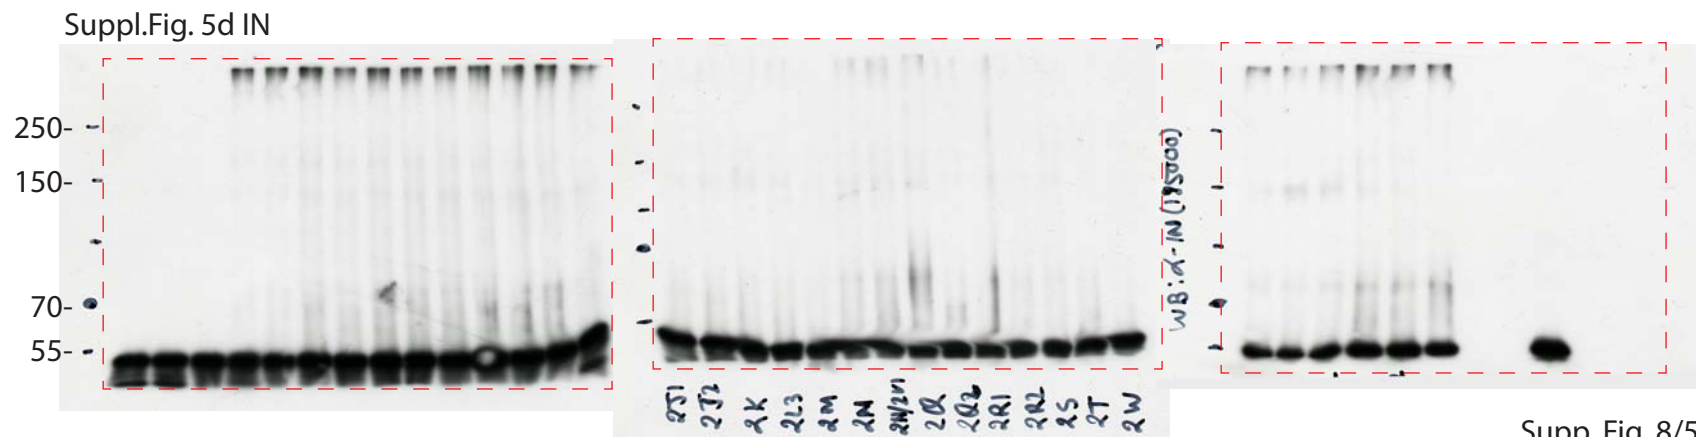

Fig.6b TRIM33

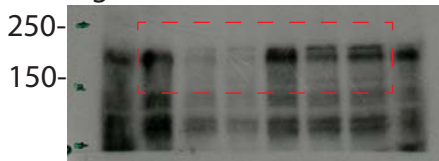

Fig.6b Tubulin

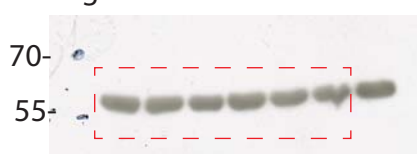

Fig.6e FlagIN

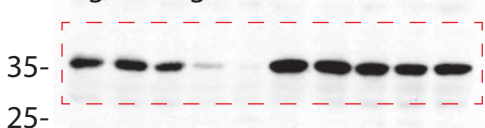

Fig.6e FlagIN (S75A)

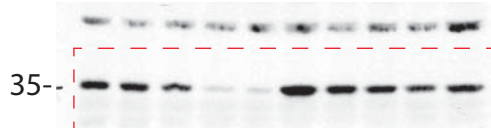

Fig.6e Tubulin

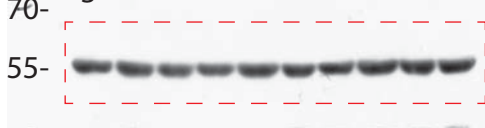

Fig.6e Tubulin

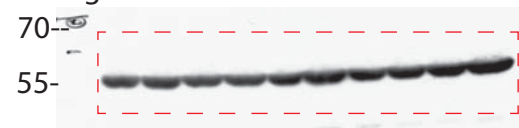

Fig.6e TRIM33

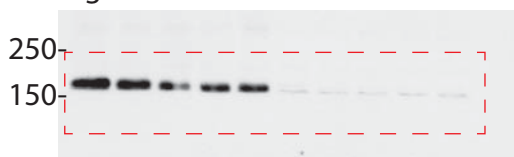

Fig.6e TRIM33

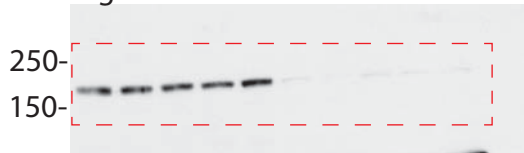

Suppl.Fig. 5b EGFP-IN

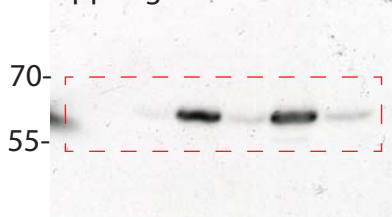

Suppl.Fig. 5b EGFP-IN

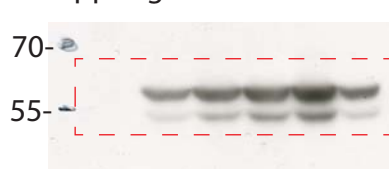

Suppl.Fig. 5b TRIM33 variants

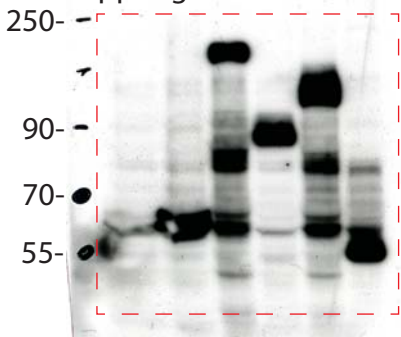

Suppl.Fig. 5b Tubulin

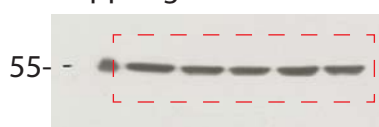

Fig.7b IN

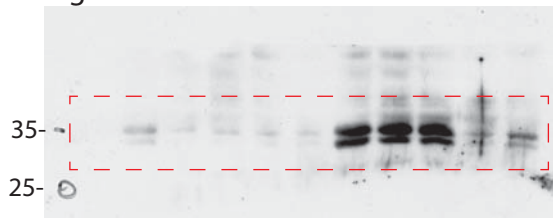

Fig.7b TRIM33

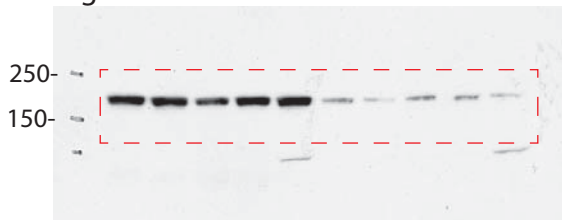

Fig.7b  $\beta$ -actin

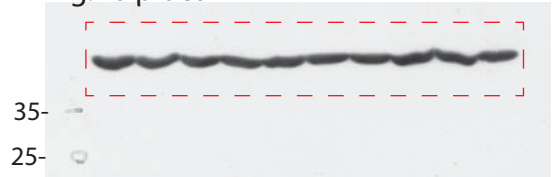

Fig.7c TRIM33

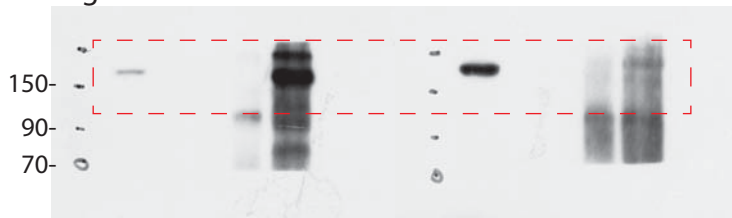

Fig.7c IN

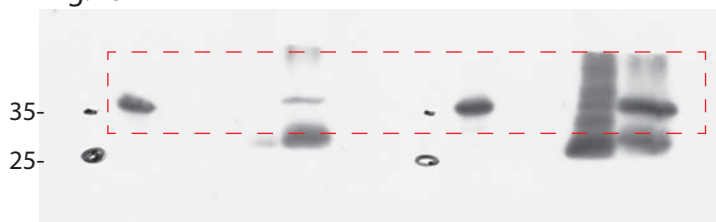

Fig.7e TRIM33

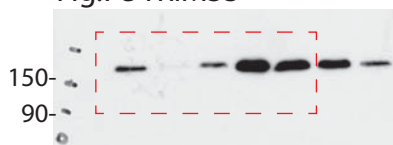

Fig.7e Tubulin

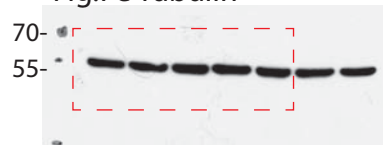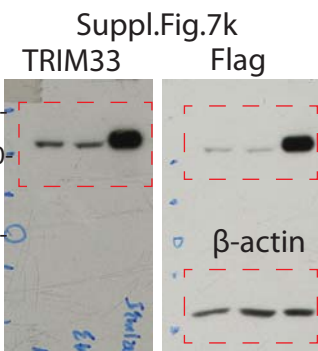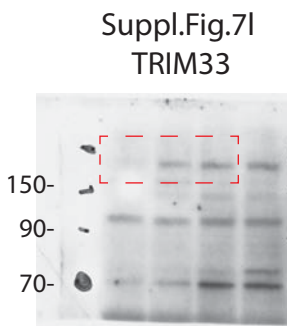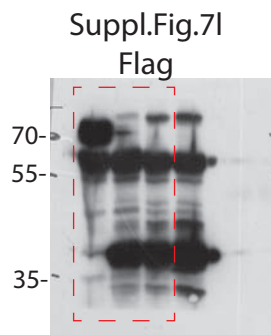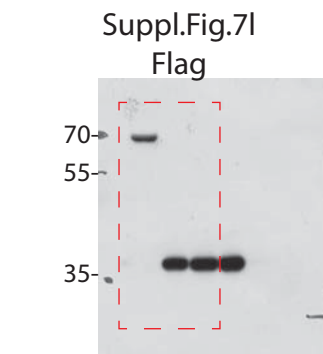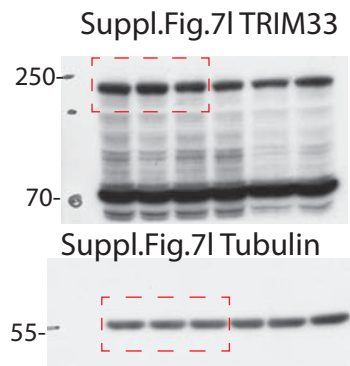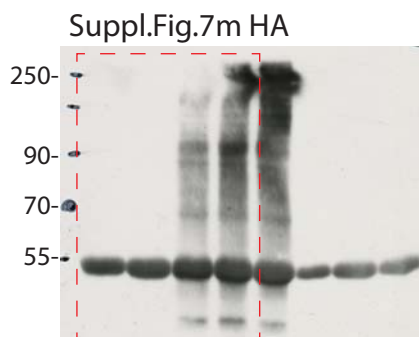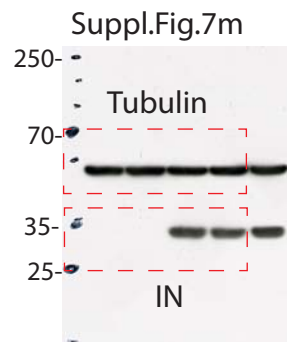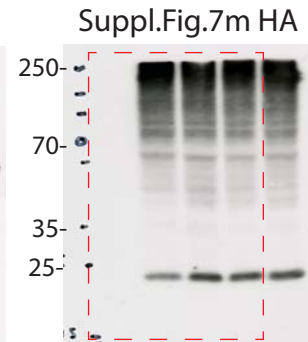



Suppl. Table 1. List of siRNA target genes and results of HTS. Color code is as in Fig. 2b

| Gene Symbol  | Entrez Gene ID | Log10 fold over<br>Control (Replicate 1) | Log10 fold over<br>Control (Replicate 2) |
|--------------|----------------|------------------------------------------|------------------------------------------|
| UBE2J2       | 118424         | 0.577921286                              | 0.864647815                              |
| RFPL3        | 10738          | 0.734611194                              | 0.772161971                              |
| FBXO28       | 23219          | 0.694426882                              | 0.725664128                              |
| MG132        |                | 0.469522765                              | 0.683302764                              |
| RNF19        | 25897          | 0.274082765                              | 0.609413291                              |
| RNF31        | 55072          | 0.523513784                              | 0.560505013                              |
| DTX2         | 113878         | 0.337581046                              | 0.527672555                              |
| TRIM33       | 51592          | 0.441829251                              | 0.475263283                              |
| RNF125       | 54941          | 0.338229725                              | 0.462988985                              |
| FBXO42       | 54455          | 0.449923419                              | 0.453957689                              |
| FBXO4        | 26272          | 0.185175697                              | 0.444567977                              |
| KIAA1333     | 55632          | 0.234377305                              | 0.443066689                              |
| NHLRC1       | 378884         | 0.470957645                              | 0.418665647                              |
| ZNRF1        | 84937          | 0.337581046                              | 0.40847164                               |
| TRIM65       | 201292         | -0.139540228                             | 0.39299892                               |
| DCUN1D2      | 55208          | 0.288855964                              | 0.370880428                              |
| TRIM72       | 493829         | 0.463977899                              | 0.367314167                              |
| MDM2         | 4193           | 0.364329758                              | 0.3641193                                |
| RNF169       | 254225         | 0.113671666                              | 0.360698851                              |
| RNF151       | 146310         | 0.056222778                              | 0.34715802                               |
| LONRF3       | 79836          | 0.378442237                              | 0.31156167                               |
| EDD1         | 51366          | 0.218445959                              | 0.307699232                              |
| RKHD1        | 399664         | 0.407577501                              | 0.301956009                              |
| UBE2G2       | 7327           | -0.159465533                             | 0.28569905                               |
| LRRRC29      | 26231          | 0.187933105                              | 0.272537546                              |
| UBE4A        | 9354           | 0.070863534                              | 0.267309507                              |
| MARCH4       | 57574          | 0.198791203                              | 0.252015905                              |
| FBXL11       | 22992          | 0.013214012                              | 0.246533293                              |
| M96          | 22823          | -0.427147326                             | 0.244426314                              |
| LNX2         | 222484         | -0.08386718                              | 0.241512363                              |
| LOC642219    | 642219         | 0.09250941                               | 0.240980583                              |
| UBE2I        | 7329           | 0.169210802                              | 0.23481658                               |
| RNF128       | 79589          | 0.171119773                              | 0.231837209                              |
| ASB6         | 140459         | 0.115299239                              | 0.223606512                              |
| TSG101       | 7251           | 0.197896681                              | 0.219152112                              |
| TRIML1       | 339976         | 0.337581046                              | 0.197640804                              |
| TRIM15       | 89870          | 0.222272328                              | 0.197640804                              |
| TRIM6-TRIM34 | 445372         | 0.066644167                              | 0.191123353                              |
| FSD1L        | 83856          | 0.405361559                              | 0.189628413                              |
| LOC390231    | 390231         | 0.053734002                              | 0.189328862                              |
| RNF182       | 221687         | 0.203236381                              | 0.182988672                              |
| FBXL16       | 146330         | -0.340168767                             | 0.179630198                              |
| PDC          | 5132           | 0.408956638                              | 0.178402494                              |
| CUL1         | 8454           | -0.029207248                             | 0.164346609                              |
| UBE4B        | 10277          | -0.159465533                             | 0.160520151                              |
| FBXW5        | 54461          | 0.098179423                              | 0.157628095                              |
| AKTIP        | 64400          | 0.313215501                              | 0.156659679                              |
| PCGF2        | 7703           | 0.337905507                              | 0.154391712                              |
| TRIM25       | 7706           | -0.176091237                             | 0.152112144                              |
| BIRC8        | 112401         | 0.115299239                              | 0.152112144                              |
| TRIM62       | 55223          | -0.225393995                             | 0.14053004                               |
| LOC441061    | 441061         | 0.141564525                              | 0.135470411                              |
| ZNF179       | 7732           | -0.111268185                             | 0.134451245                              |
| BAHD1        | 22893          | 0.004216442                              | 0.132747516                              |
| MKRN3        | 7681           | 0.134886959                              | 0.115331542                              |
| SOCS4        | 122809         | 0.130203139                              | 0.112836831                              |
| RAD18        | 56852          | -0.205676361                             | 0.100510462                              |
| RAG1         | 5896           | -0.194482559                             | 0.091593807                              |
| RNF34        | 80196          | -0.152387244                             | 0.088958165                              |
| LOC51136     | 51136          | -0.007119713                             | 0.086686497                              |
| SPSB3        | 90864          | -0.929736728                             | 0.082490237                              |

| Gene Symbol | Entrez Gene ID | Log10 fold over<br>Control (Replicate 1) | Log10 fold over<br>Control (Replicate 2) |
|-------------|----------------|------------------------------------------|------------------------------------------|
| RNF7        | 9616           | -0.020977513                             | 0.077865877                              |
| STUB1       | 10273          | -0.195589031                             | 0.075924524                              |
| LOC728919   | 728919         | 0.349743246                              | 0.072015588                              |
| PHF10       | 55274          | 0.199683886                              | 0.071622825                              |
| RNF38       | 152006         | -0.206811761                             | 0.065288345                              |
| NSD1        | 64324          | 0.350374023                              | 0.062086117                              |
| MYLIP       | 29116          | -0.096910013                             | 0.061282045                              |
| PRPF19      | 27339          | 0.378737572                              | 0.061282045                              |
| WHSC1       | 7468           | -0.438627029                             | 0.058860102                              |
| RBX1        | 9978           | -0.362363896                             | 0.056017451                              |
| MARCH8      | 220972         | 0.031982969                              | 0.05233528                               |
| RNF12       | 51132          | 0.168253161                              | 0.049863169                              |
| TULP4       | 56995          | 0.15708548                               | 0.049863169                              |
| WWP2        | 11060          | -0.043800344                             | 0.046960815                              |
| TRIM71      | 131405         | -0.329482612                             | 0.040675903                              |
| WDR71       | 80227          | 0.128630249                              | 0.04025334                               |
| SPSB2       | 84727          | -0.089037415                             | 0.039407773                              |
| UBE2D1      | 7321           | -0.194482559                             | 0.034726292                              |
| FBXO18      | 84893          | 0.349743246                              | 0.031721044                              |
| ARIH1       | 25820          | -0.172925074                             | 0.031721044                              |
| LOC643904   | 643904         | -0.126117272                             | 0.029127996                              |
| MIB2        | 142678         | -0.176091237                             | 0.027390792                              |
| FBXO31      | 79791          | -0.010723846                             | 0.026955506                              |
| RNF4        | 6047           | 0.238474412                              | 0.025209572                              |
| LOC644006   | 644006         | 0.136952552                              | 0.024334172                              |
| MKRN2       | 23609          | -0.011448267                             | 0.020813989                              |
| PCGF1       | 84759          | 0.116380909                              | 0.020372057                              |
| SHPRH       | 257218         | -0.06133385                              | 0.01904314                               |
| TRIM68      | 55128          | -0.803448565                             | 0.016373044                              |
| RFWD3       | 55159          | -0.017287639                             | 0.015926567                              |
| BRPF1       | 7862           | -0.048512447                             | 0.012337288                              |
| TIP120A     | 55832          | 0.033946605                              | 0.010531462                              |
| LNX1        | 84708          | -0.209091504                             | 0.010078936                              |
| CCNF        | 899            | 0.083281116                              | 0.003232554                              |
| ASB17       | 127247         | 0.042354568                              | 0.003232554                              |
| C1orf164    | 55182          | -0.217166259                             | 0.001388389                              |
| UBE2Q1      | 55585          | -0.307432511                             | -0.000463727                             |
| <i>NT1</i>  |                | -0.341717039                             | -0.011268831                             |
| AMFR        | 267            | -0.2160035                               | -0.013175706                             |
| PHF11       | 51131          | -0.326477132                             | -0.017497069                             |
| RNF41       | 10193          | -0.049302784                             | -0.020402099                             |
| MARCH5      | 54708          | -0.2823701                               | -0.021861864                             |
| DCUN1D1     | 54165          | -0.089037415                             | -0.022349591                             |
| ASB15       | 142685         | -0.254848979                             | -0.024305902                             |
| FBXW2       | 26190          | -0.30600157                              | -0.025778871                             |
| LOC642678   | 642678         | 0.212425735                              | -0.028245068                             |
| LOC653192   | 653192         | -0.206811761                             | -0.032719843                             |
| PDZRN4      | 29951          | -0.494408894                             | -0.034221724                             |
| TRIM42      | 287015         | -0.011448267                             | -0.034723492                             |
| HR          | 55806          | -0.153391384                             | -0.037746428                             |
| UBE2Q2      | 92912          | 0.039139971                              | -0.040281684                             |
| RNF113A     | 7737           | -0.166661101                             | -0.041300021                             |
| UBE2A       | 7319           | 0.184714422                              | -0.041300021                             |
| CUL4B       | 8450           | -0.075384576                             | -0.042320656                             |
| TRIM47      | 91107          | -0.244807065                             | -0.044882882                             |
| UNK         | 85451          | -0.316118693                             | -0.047460315                             |
| UBE2V2      | 7336           | 0.098742339                              | -0.047460315                             |
| C6ORF49     | 29964          | -0.298916657                             | -0.049533303                             |
| TRIM74      | 378108         | 0.094786166                              | -0.050573543                             |
| TRAF5       | 7188           | -0.220673403                             | -0.05370925                              |
| RAB40B      | 10966          | -0.45442138                              | -0.054234059                             |
| BIRC6       | 57448          | 0.054980173                              | -0.054759553                             |
| KRTAP5-9    | 3846           | -0.028452617                             | -0.056339762                             |

| Gene Symbol | Entrez Gene ID | Log10 fold over<br>Control (Replicate 1) | Log10 fold over<br>Control (Replicate 2) |
|-------------|----------------|------------------------------------------|------------------------------------------|
| FBXO6       | 26270          | -0.298916657                             | -0.057396454                             |
| SSA1        | 6737           | -0.175033283                             | -0.058455674                             |
| HACE1       | 57531          | -0.22184875                              | -0.060049413                             |
| C10ORF46    | 143384         | -0.279672636                             | -0.060581995                             |
| RNF139      | 11236          | -0.338625994                             | -0.061649072                             |
| FBXO46      | 23403          | 0.547184131                              | -0.06218357                              |
| TRIM45      | 80263          | -0.436692548                             | -0.063254545                             |
| LOC644006   | 644006         | -0.329482612                             | -0.064866075                             |
| BIRC2       | 329            | -0.259958412                             | -0.070281259                             |
| FLJ10916    | 55258          | -0.193378898                             | -0.072466422                             |
| FBXW10      | 10517          | -0.6650234                               | -0.073563089                             |
| RSPRY1      | 89970          | -0.609898089                             | -0.075764869                             |
| FBXL10      | 84678          | -0.014358184                             | -0.076317037                             |
| DZIP3       | 9666           | 0.141564525                              | -0.077423535                             |
| UBE2B       | 7320           | -0.128009607                             | -0.082437884                             |
| TRIM73      | 375593         | -0.452415417                             | -0.082998607                             |
| UBOX5       | 22888          | -0.234992105                             | -0.084122282                             |
| ARIH1       | 25820          | -0.143452839                             | -0.084122282                             |
| UBE2W       | 55284          | -0.128009607                             | -0.092643682                             |
| JARID1B     | 10765          | 0.04744894                               | -0.0932178                               |
| DTX3        | 196403         | -0.334030288                             | -0.097257751                             |
| TRIM29      | 23650          | 0.264971215                              | -0.099583326                             |
| RNF186      | 54546          | 0.311150514                              | -0.105452283                             |
| TRIAD3      | 54476          | -0.073707727                             | -0.109608215                             |
| FBXO47      | 494188         | -0.329482612                             | -0.111401583                             |
| UBE2E3      | 10477          | 0.167293404                              | -0.115010691                             |
| KIAA1542    | 57661          | 0.073256323                              | -0.115010691                             |
| HUWE1       | 10075          | -0.269047108                             | -0.125402463                             |
| ZFAND6      | 54469          | -0.300324406                             | -0.128506809                             |
| BMI1        | 648            | -0.118629268                             | -0.128506809                             |
| LOC200933   | 200933         | -0.031479087                             | -0.129130327                             |
| FBXO7       | 25793          | 0.02202895                               | -0.130380112                             |
| TRIM3       | 10612          | -0.39442347                              | -0.130380112                             |
| HECTD1      | 25831          | -0.122357161                             | -0.131006327                             |
| PHF7        | 51533          | -0.047723546                             | -0.134782875                             |
| ZSWIM2      | 151112         | 0.089071738                              | -0.135415475                             |
| TRIM22      | 10346          | 0.124408683                              | -0.136048998                             |
| FBXO15      | 201456         | 0.116380909                              | -0.138592491                             |
| HERC3       | 8916           | -0.207950137                             | -0.138592491                             |
| RC3H1       | 149041         | -0.39442347                              | -0.139869846                             |
| MID2        | 11043          | -0.592975553                             | -0.141150908                             |
| PHF5A       | 84844          | -0.223027285                             | -0.141792859                             |
| SYTL3       | 94120          | 0.059313826                              | -0.141792859                             |
| RNF113B     | 140432         | -0.010000631                             | -0.142435821                             |
| LOC652591   | 652591         | -0.346395351                             | -0.143079676                             |
| TRIM28      | 10155          | -0.72068926                              | -0.147613768                             |
| RNF207      | 388591         | -0.209091504                             | -0.148265351                             |
| UBE1        | 7317           | -0.256120693                             | -0.148265351                             |
| WDR59       | 79726          | -0.176091237                             | -0.151538133                             |
| UBE1DC1     | 79876          | -0.230166535                             | -0.154174196                             |
| ZNRF2       | 223082         | -0.079605168                             | -0.154835766                             |
| SOCS6       | 9306           | -0.273001218                             | -0.154835766                             |
| CUL5        | 8065           | -0.681665107                             | -0.157491983                             |
| RNF11       | 26994          | -0.188992025                             | -0.15815863                              |
| NEURL       | 9148           | -0.278330162                             | -0.15882624                              |
| ZNF185      | 7739           | 0.011841846                              | -0.159494877                             |
| UBE2R2      | 54926          | -0.036826662                             | -0.162853719                             |
| RNF43       | 54894          | 0.192943605                              | -0.163528591                             |
| TRIM38      | 10475          | -0.102238848                             | -0.164881552                             |
| ASB18       | 401036         | -0.815747343                             | -0.165559585                             |
| EEA1        | 8411           | -0.104927959                             | -0.166918898                             |
| ASB9        | 140462         | -0.298916657                             | -0.167600186                             |
| PHF1        | 5252           | -0.293330769                             | -0.17033588                              |

| Gene Symbol  | Entrez Gene ID | Log10 fold over<br>Control (Replicate 1) | Log10 fold over<br>Control (Replicate 2) |
|--------------|----------------|------------------------------------------|------------------------------------------|
| AIRE         | 326            | -0.612783926                             | -0.17033588                              |
| HERC2        | 8924           | -0.290564581                             | -0.171022489                             |
| SYTL4        | 94121          | 0.176326583                              | -0.173088917                             |
| FLJ34154     | 283450         | -0.415963155                             | -0.177949209                             |
| TRIM26       | 7726           | 0.119609847                              | -0.177949209                             |
| RAB40C       | 57799          | -0.311753842                             | -0.18004894                              |
| TRIM46       | 80128          | -0.090774578                             | -0.180751156                             |
| TRIM41       | 90933          | -0.134698594                             | -0.181454443                             |
| FBXL3P       | 26223          | -0.257396221                             | -0.186409739                             |
| FBXL7        | 23194          | -0.097793615                             | -0.189266987                             |
| INTS12       | 57117          | -0.226582277                             | -0.189984213                             |
| PHF19        | 26147          | 0.201019479                              | -0.189984213                             |
| DCUN1D5      | 84259          | -0.123294141                             | -0.192865154                             |
| RUFY1        | 80230          | 0.186556589                              | -0.195038437                             |
| CUL3         | 8452           | -0.167698832                             | -0.197953146                             |
| MSL2L1       | 55167          | 0.007699141                              | -0.200152105                             |
| TRIM6        | 117854         | -0.505573918                             | -0.200887618                             |
| DPF3         | 8110           | -0.224209028                             | -0.202362255                             |
| SPSB1        | 80176          | -0.097793615                             | -0.202362255                             |
| FBXL18       | 80028          | -0.808871612                             | -0.203101454                             |
| SPRYD5       | 84767          | 0.065431066                              | -0.203841984                             |
| TRIM54       | 57159          | -0.128958934                             | -0.205326773                             |
| RNF5         | 6048           | -0.332509036                             | -0.20607104                              |
| UBE2E2       | 7325           | -0.088171379                             | -0.207563482                             |
| PHF6         | 84295          | -0.685071321                             | -0.209811701                             |
| MLL3         | 58508          | -0.430940277                             | -0.210563771                             |
| BARD1        | 580            | -0.517033567                             | -0.215864692                             |
| FBXL4        | 26235          | -0.403268789                             | -0.215864692                             |
| PDZRN3       | 23024          | -0.460495466                             | -0.216627327                             |
| DKFZP547C195 | 257160         | -0.514717205                             | -0.218923157                             |
| UBR1         | 197131         | -0.152387244                             | -0.218923157                             |
| RC3H2        | 54542          | -0.113096778                             | -0.219691187                             |
| SOCS7        | 30837          | -0.483523726                             | -0.222003241                             |
| ARIH2        | 10425          | -0.380635111                             | -0.225884376                             |
| TRIM75       | 391714         | -0.397940009                             | -0.225884376                             |
| KIAA0804     | 23355          | -0.290564581                             | -0.225884376                             |
| TRIM5        | 85363          | -0.355905831                             | -0.225884376                             |
| MYCBP2       | 23077          | -0.102238848                             | -0.23295907                              |
| TRIM55       | 84675          | 0.04171355                               | -0.23693974                              |
| LOC652433    | 652433         | -0.421519182                             | -0.238542326                             |
| PARK2        | 5071           | -0.405059788                             | -0.238542326                             |
| UBE2D2       | 7322           | -0.688504674                             | -0.239345804                             |
| PHF21A       | 51317          | -0.494408894                             | -0.240150847                             |
| TRIM69       | 140691         | -0.39617818                              | -0.240150847                             |
| CXXC1        | 30827          | -0.479244971                             | -0.242574817                             |
| BAZ1B        | 9031           | -0.4645927                               | -0.244198295                             |
| RNF26        | 79102          | -0.324982156                             | -0.245827941                             |
| ZNF278       | 23598          | -0.412298125                             | -0.248283972                             |
| FBXO24       | 26261          | -0.419659264                             | -0.251580308                             |
| PCGF5        | 84333          | -0.517033567                             | -0.251580308                             |
| HERC6        | 55008          | -0.06871578                              | -0.251580308                             |
| TRIM58       | 25893          | -0.406858094                             | -0.254901854                             |
| RNF111       | 54778          | -0.417807278                             | -0.254901854                             |
| MARCH9       | 92979          | -0.28372514                              | -0.254901854                             |
| RNF180       | 285671         | -0.207950137                             | -0.256572242                             |
| RNF149       | 284996         | -0.253580978                             | -0.256572242                             |
| PJA2         | 9867           | -0.262535809                             | -0.257409812                             |
| HERC5        | 51191          | -0.322007463                             | -0.258249079                             |
| TRIM50A      | 135892         | -0.227773746                             | -0.259089892                             |
| PHF2         | 5253           | -0.460495466                             | -0.262469677                             |
| FBXO25       | 26260          | -0.618613412                             | -0.262469677                             |
| RNF13        | 11342          | -0.232572655                             | -0.26331871                              |
| TRAF4        | 9618           | -0.332509036                             | -0.26502185                              |

| Gene Symbol | Entrez Gene ID | Log10 fold over<br>Control (Replicate 1) | Log10 fold over<br>Control (Replicate 2) |
|-------------|----------------|------------------------------------------|------------------------------------------|
| TRIM60      | 166655         | -0.177151775                             | -0.26502185                              |
| TIF1        | 8805           | -0.642747035                             | -0.269309033                             |
| RNF133      | 168433         | -0.29611469                              | -0.270171636                             |
| LGR6        | 59352          | -0.425263085                             | -0.279774523                             |
| RNF168      | 165918         | -0.276991742                             | -0.279774523                             |
| RNF187      | 149603         | -0.558426138                             | -0.280658104                             |
| PRICKLE1    | 144165         | -0.332509036                             | -0.285103345                             |
| TRIM48      | 79097          | -0.083011435                             | -0.285103345                             |
| UBE1L       | 7318           | -0.592975553                             | -0.286894276                             |
| FBXO36      | 130888         | -0.297513457                             | -0.286894276                             |
| WSB1        | 26118          | -0.300324406                             | -0.288692539                             |
| RNF152      | 220441         | -0.884159589                             | -0.289594471                             |
| SCEL        | 8796           | -0.39617818                              | -0.290498364                             |
| SOCS3       | 9021           | -0.429039661                             | -0.293221216                             |
| MNAT1       | 4331           | 0.064214566                              | -0.293221216                             |
| FBXL19      | 54620          | -0.341717039                             | -0.295961247                             |
| TRIM37      | 4591           | -0.159465533                             | -0.297797614                             |
| RNF190      | 162333         | -0.111268185                             | -0.302422751                             |
| MKRN1       | 23608          | -0.39093507                              | -0.306158602                             |
| WWP1        | 11059          | 0.09364928                               | -0.306158602                             |
| FBXO16      | 157574         | -0.771841754                             | -0.307097586                             |
| DCUN1D3     | 123879         | -0.131819252                             | -0.308038693                             |
| FBXL5       | 26234          | -0.010000631                             | -0.310874134                             |
| RNF150      | 57484          | -0.179280718                             | -0.31182338                              |
| KIAA0644    | 9865           | -0.65533623                              | -0.31468372                              |
| FBXW8       | 26259          | -0.658541338                             | -0.315641429                             |
| UBE2NL      | 389898         | -0.415963155                             | -0.317563024                             |
| TRIM31      | 11074          | -0.538455105                             | -0.323379632                             |
| PEX10       | 5192           | -0.399709014                             | -0.327301014                             |
| UBE1L2      | 55236          | -0.35912281                              | -0.330265486                             |
| RNF126      | 55658          | -0.615688888                             | -0.332253134                             |
| FBXL17      | 64839          | -0.343270852                             | -0.33525172                              |
| UBE2S       | 27338          | -0.368919343                             | -0.336255836                             |
| UHRF2       | 115426         | -0.089905128                             | -0.337262279                             |
| FBXO27      | 126433         | -0.601354402                             | -0.341311727                             |
| FBXO3       | 26273          | -0.519362207                             | -0.341311727                             |
| RNF166      | 115992         | -0.4645927                               | -0.343350604                             |
| MLLT6       | 4302           | -0.706089674                             | -0.346427171                             |
| TRIM17      | 51127          | -0.417807278                             | -0.347457492                             |
| MARCH7      | 64844          | -0.06214789                              | -0.35160349                              |
| BIRC3       | 330            | -0.886328334                             | -0.358955736                             |
| ZNF364      | 27246          | -0.438627029                             | -0.363213516                             |
| SH3MD4      | 344558         | -0.512413274                             | -0.365358213                             |
| TRIM64      | 120146         | -0.648996114                             | -0.365358213                             |
| BRAP        | 8315           | -0.479244971                             | -0.365358213                             |
| CDC34       | 997            | -0.479244971                             | -0.366434495                             |
| CISH        | 1154           | -0.6782854                               | -0.368595197                             |
| UBR2        | 23304          | -0.425263085                             | -0.368595197                             |
| ASB4        | 51666          | -0.138567574                             | -0.374044405                             |
| TTC3        | 7267           | -0.492209952                             | -0.378453583                             |
| HERC4       | 26091          | -0.266430894                             | -0.391956023                             |
| PHF20L1     | 51105          | -0.481379079                             | -0.393100371                             |
| BTRC        | 8945           | -0.470811758                             | -0.395398261                             |
| UBE2N       | 7334           | -0.76356931                              | -0.396551728                             |
| ZNF645      | 158506         | -0.303153668                             | -0.396551728                             |
| LOC653111   | 653111         | -0.490022087                             | -0.397708266                             |
| TNFRSF25    | 8718           | -0.258675427                             | -0.398868001                             |
| FBXO33      | 254170         | -0.743552149                             | -0.400030732                             |
| RCHY1       | 25898          | -0.2823701                               | -0.401196694                             |
| RNF32       | 140545         | -0.36074028                              | -0.403537831                             |
| C13ORF7     | 79596          | -0.403268789                             | -0.40471326                              |
| FBXO41      | 150726         | -0.213687281                             | -0.408258533                             |
| ASB12       | 142689         | -0.307432511                             | -0.411832985                             |

| Gene Symbol      | Entrez Gene ID | Log10 fold over<br>Control (Replicate 1) | Log10 fold over<br>Control (Replicate 2) |
|------------------|----------------|------------------------------------------|------------------------------------------|
| FLJ14627         | 84900          | -0.553346664                             | -0.413030999                             |
| NDP52            | 10241          | -0.935176758                             | -0.416645112                             |
| NEDD4L           | 23327          | -0.237425109                             | -0.417856493                             |
| SMARCA3          | 6596           | -0.826505754                             | -0.421511272                             |
| UBE2C            | 11065          | -0.747482403                             | -0.422736322                             |
| FBXO39           | 162517         | -0.548325912                             | -0.425196953                             |
| FBXL20           | 84961          | -0.427147326                             | -0.430160322                             |
| TOPORS           | 10210          | -0.234992105                             | -0.435181119                             |
| RKHD3            | 84206          | -0.417807278                             | -0.43644547                              |
| ASB5             | 140458         | -0.427147326                             | -0.437713442                             |
| ZNF330           | 27309          | -0.713328233                             | -0.437713442                             |
| FBXW11           | 23291          | -0.354306234                             | -0.438985245                             |
| MLLT10           | 8028           | -0.540901816                             | -0.447993096                             |
| IRF2BP1          | 26145          | -0.789309693                             | -0.45454369                              |
| UBE3C            | 9690           | -0.205676361                             | -0.4558657                               |
| UBE2D4           | 51619          | -0.187902212                             | -0.457191871                             |
| RNF175           | 285533         | -0.349542394                             | -0.458521978                             |
| TRIM59           | 286827         | -0.202287795                             | -0.459856298                             |
| TRAF3            | 7187           | -0.648996114                             | -0.461194604                             |
| IBRDC1           | 154214         | -0.313203893                             | -0.462537047                             |
| RNF14            | 9604           | -0.716993151                             | -0.463883652                             |
| BAZ2B            | 29994          | -0.269047108                             | -0.465234572                             |
| KUA-UEV          | 387522         | -0.24604967                              | -0.466589581                             |
| LOC120824        | 120824         | -0.107633881                             | -0.466589581                             |
| VPS18            | 57617          | -0.906920281                             | -0.466589581                             |
| CCL20            | 6364           | -0.618613412                             | -0.467948958                             |
| RNF135           | 84282          | -0.186815127                             | -0.470680287                             |
| OIT3             | 170392         | -0.639655989                             | -0.472052549                             |
| WDSUB1           | 151525         | -0.392675714                             | -0.473429031                             |
| ZNF313           | 55905          | -0.300324406                             | -0.476195284                             |
| RNF138           | 51444          | 0.183327651                              | -0.47897927                              |
| TRAF6            | 7189           | -0.695453466                             | -0.480377918                             |
| C20ORF18         | 10616          | -0.327977272                             | -0.481781086                             |
| RNF144           | 9781           | -0.432849248                             | -0.484601227                             |
| LOC283116        | 283116         | -0.36074028                              | -0.486018128                             |
| TRIM56           | 81844          | -0.54336239                              | -0.488866009                             |
| TRIP             | 10293          | -0.52642399                              | -0.488866009                             |
| MGRN1            | 23295          | -0.590217977                             | -0.491732688                             |
| SMURF1           | 57154          | -0.521703399                             | -0.494618279                             |
| MDM4             | 4194           | 0.04171355                               | -0.494618279                             |
| HECW1            | 23072          | -0.642747035                             | -0.496068432                             |
| FBXO38           | 81545          | -0.514717205                             | -0.49898321                              |
| DCUN1D4          | 23142          | -0.385754609                             | -0.500447899                             |
| SH3RF2           | 153769         | -0.652154603                             | -0.503392319                             |
| RNF130           | 55819          | -0.45442138                              | -0.50487198                              |
| RFPL2            | 10739          | -0.122357161                             | -0.510841837                             |
| LOC652859        | 652859         | -0.372234551                             | -0.510841837                             |
| BRPF3            | 27154          | -0.776037826                             | -0.512347142                             |
| MARCH6           | 10299          | -0.645860239                             | -0.513857682                             |
| RNF103           | 7844           | -0.423387099                             | -0.518421228                             |
| FBXL13           | 222235         | 0.224804638                              | -0.518421228                             |
| LL0XNC01-237H1.1 | 282808         | -0.392675714                             | -0.519953081                             |
| ASB2             | 51676          | -0.11401397                              | -0.5214905                               |
| FBXL3A           | 26224          | -0.104029738                             | -0.5214905                               |
| BRCA1            | 672            | -0.538455105                             | -0.523033237                             |
| ASB13            | 79754          | -0.39617818                              | -0.524581618                             |
| WHSC1L1          | 54904          | -0.582049269                             | -0.526135394                             |
| RFFL             | 117584         | -0.958928417                             | -0.52925987                              |
| TRIM2            | 23321          | 0.129155072                              | -0.52925987                              |
| RFP2             | 10206          | -0.923771112                             | -0.537170618                             |
| RNF122           | 79845          | -0.17821491                              | -0.541987229                             |
| MAP3K1           | 4214           | -0.136628775                             | -0.543604812                             |
| FBXO30           | 84085          | -0.642747035                             | -0.546858013                             |



| Gene Symbol | Entrez Gene ID | Log10 fold over<br>Control (Replicate 1) | Log10 fold over<br>Control (Replicate 2) |
|-------------|----------------|------------------------------------------|------------------------------------------|
| TRIM36      | 55521          | -0.448431075                             | -0.550135613                             |
| FBXO40      | 51725          | -0.337088682                             | -0.553438292                             |
| PCGF6       | 84108          | -0.759491438                             | -0.553438292                             |
| UBE2J1      | 51465          | -0.373901796                             | -0.560119966                             |
| FBXL15      | 79176          | -0.483523726                             | -0.561806493                             |
| ZNF294      | 26046          | -0.444482834                             | -0.563499594                             |
| CHFR        | 55743          | -0.521703399                             | -0.565199321                             |
| PCGF3       | 10336          | -0.52642399                              | -0.566905887                             |
| UBE2H       | 7328           | -1.254848979                             | -0.575540291                             |
| SOCS2       | 8835           | -0.76356931                              | -0.577287899                             |
| CAND2       | 23066          | -0.848857011                             | -0.577287899                             |
| CGRRF1      | 10668          | -0.53360265                              | -0.580804519                             |
| BFAR        | 51283          | -0.604183664                             | -0.582573482                             |
| TRAF7       | 84231          | -0.472904726                             | -0.584349847                             |
| FBXL22      | 283807         | -0.590217977                             | -0.587924188                             |
| ASB1        | 51665          | -0.685071321                             | -0.589722619                             |
| FBXW9       | 84261          | -0.406858094                             | -0.589722619                             |
| RNF165      | 494470         | -0.512413274                             | -0.593341639                             |
| TRIM4       | 89122          | -0.615688888                             | -0.593341639                             |
| ASB8        | 140461         | 0.00491522                               | -0.595162693                             |
| LOC51255    | 51255          | -0.674931792                             | -0.598827524                             |
| ZNF216      | 7763           | -0.129910282                             | -0.600671775                             |
| UBE2G1      | 7326           | -0.607031478                             | -0.600671775                             |
| TRIM39      | 56658          | -0.54336239                              | -0.604383592                             |
| RNF185      | 91445          | -0.494408894                             | -0.611904129                             |
| AOF1        | 221656         | -0.864595721                             | -0.613804701                             |
| IBRDC3      | 127544         | -0.139540228                             | -0.615713805                             |
| MLL4        | 9757           | -0.203414359                             | -0.615713805                             |
| ZNF650      | 130507         | -0.494408894                             | -0.619557015                             |
| FBXL14      | 144699         | -0.45442138                              | -0.621491631                             |
| FBXO32      | 114907         | -0.538455105                             | -0.621491631                             |
| RNF8        | 9025           | -0.490022087                             | -0.623434722                             |
| FBXO2       | 26232          | -0.550829033                             | -0.623434722                             |
| HECTD3      | 79654          | -0.910353424                             | -0.625386544                             |
| CHD5        | 26038          | -0.706089674                             | -0.625386544                             |
| FBXO22      | 26263          | -0.75144855                              | -0.627347363                             |
| DPF2        | 5977           | -0.636586788                             | -0.63328313                              |
| LOC342897   | 342897         | -0.868229968                             | -0.635279822                             |
| BIRC7       | 79444          | -0.841931963                             | -0.635279822                             |
| SIAH2       | 6478           | -0.444482834                             | -0.635279822                             |
| FBXO10      | 26267          | -0.65533623                              | -0.639301149                             |
| RNF123      | 63891          | -0.636586788                             | -0.639301149                             |
| SOCS1       | 8651           | -0.563565884                             | -0.64336006                              |
| BIRC4       | 331            | -0.627507036                             | -0.645403734                             |
| UBE2L3      | 7332           | -1.291945473                             | -0.645403734                             |
| TRIM23      | 373            | -0.771841754                             | -0.645403734                             |
| CBLL1       | 79872          | -0.75144855                              | -0.649520355                             |
| LOC649055   | 649055         | -0.919056925                             | -0.653676175                             |
| RNF146      | 81847          | -0.685071321                             | -0.653676175                             |
| JARID1D     | 8284           | -0.458461317                             | -0.653676175                             |
| LOC642446   | 642446         | -0.512413274                             | -0.65576929                              |
| RAPSN       | 5913           | -1.039138771                             | -0.65576929                              |
| SOCS5       | 9655           | -1.035292066                             | -0.666388309                             |
| LRSAM1      | 90678          | -0.789744635                             | -0.668543549                             |
| FBXO43      | 286151         | -0.392675714                             | -0.672886588                             |
| KIAA1718    | 80853          | -0.410477199                             | -0.675074401                             |
| RFP         | 5987           | -0.477121298                             | -0.677273291                             |
| ZNF592      | 9640           | -0.372234551                             | -0.681704964                             |
| CBLC        | 23624          | -1.046149981                             | -0.68393777                              |
| NEDD4       | 4734           | -0.450418677                             | -0.686182326                             |
| RNF141      | 50862          | -0.706089674                             | -0.686182326                             |
| ASB16       | 92591          | -0.496619027                             | -0.690706328                             |
| LOC652436   | 652436         | -0.747482403                             | -0.690706328                             |



| Gene Symbol | Entrez Gene ID | Log10 fold over<br>Control (Replicate 1) | Log10 fold over<br>Control (Replicate 2) |
|-------------|----------------|------------------------------------------|------------------------------------------|
| PHF17       | 79960          | -1.005686411                             | -0.690706328                             |
| TRIM43      | 129868         | -0.354306234                             | -0.692986018                             |
| TRIM49      | 57093          | -0.921407622                             | -0.697581831                             |
| PHF23       | 79142          | -0.75144855                              | -0.704567937                             |
| VPS11       | 55823          | -0.45442138                              | -0.709288417                             |
| HRC         | 3270           | -0.598543453                             | -0.709288417                             |
| DTX3L       | 151636         | -0.716993151                             | -0.716466983                             |
| TRIM10      | 10107          | -0.483523726                             | -0.716466983                             |
| WDR24       | 84219          | -0.417807278                             | -0.718886603                             |
| FBXO8       | 26269          | -1.092518717                             | -0.72131955                              |
| ZA20D1      | 56957          | -0.128958934                             | -0.723766203                             |
| C17ORF27    | 57674          | -0.24729584                              | -0.726226949                             |
| RNF17       | 56163          | -0.636586788                             | -0.731190435                             |
| FBXO34      | 55030          | -0.731970156                             | -0.733693496                             |
| KIAA0317    | 9870           | -0.340168767                             | -0.736211068                             |
| CBL         | 867            | -0.872421301                             | -0.74385279                              |
| UBE2D3      | 7323           | -0.281019274                             | -0.746430368                             |
| TRIM7       | 81786          | -0.698970004                             | -0.746430368                             |
| MARCH2      | 51257          | -0.850355426                             | -0.749023092                             |
| HIP2        | 3093           | -0.621557763                             | -0.751631387                             |
| UBE2U       | 148581         | -0.709693984                             | -0.751631387                             |
| HECTD2      | 143279         | -0.652154603                             | -0.754255688                             |
| LPXN        | 9404           | -1.08045422                              | -0.756895695                             |
| FBXL2       | 25827          | 0.03784744                               | -0.767619704                             |
| TRIM35      | 23087          | -1.042240904                             | -0.773082416                             |
| MID1        | 4281           | -0.724417095                             | -0.775840016                             |
| RING1       | 6015           | -0.052478595                             | -0.778614977                             |
| ANAPC11     | 51529          | -0.784553854                             | -0.778614977                             |
| LMO7        | 4008           | -0.196698398                             | -0.778614977                             |
| RFPL1       | 5988           | -0.100455258                             | -0.778614977                             |
| RNF10       | 9921           | -0.519362207                             | -0.787048124                             |
| DTX4        | 23220          | -0.521703399                             | -0.789895871                             |
| FBXW7       | 55294          | -0.225393995                             | -0.789895871                             |
| MARCH3      | 115123         | -0.946890427                             | -0.792762683                             |
| LMTK3       | 114783         | -0.76356931                              | -0.792762683                             |
| PML         | 5371           | -0.671603881                             | -0.792762683                             |
| PHF8        | 23133          | -0.728177206                             | -0.795648275                             |
| RAB40A      | 142684         | -0.6782854                               | -0.79855344                              |
| TRIM40      | 135644         | -0.373901796                             | -0.79855344                              |
| LOC120824   | 120824         | -0.405059788                             | -0.801477895                             |
| RNF6        | 6049           | -1.057286382                             | -0.801477895                             |
| UBE2Z       | 65264          | -0.75144855                              | -0.801477895                             |
| RNF167      | 26001          | -0.392675714                             | -0.804422177                             |
| UBE2O       | 63893          | -0.582049269                             | -0.804422177                             |
| ASB3        | 51130          | -0.853871964                             | -0.810371587                             |
| SH3MD2      | 57630          | -0.844392537                             | -0.813376996                             |
| FBXL8       | 55336          | -0.75144855                              | -0.816403633                             |
| RNF121      | 55298          | -0.674931792                             | -0.819451224                             |
| LOC652759   | 652759         | -0.294720499                             | -0.822520352                             |
| VPS41       | 27072          | -0.132776894                             | -0.828724745                             |
| PHF3        | 23469          | -0.841441516                             | -0.831860648                             |
| UNKL        | 64718          | -1.137597093                             | -0.838200613                             |
| LOC399940   | 399940         | -0.485679016                             | -0.841405946                             |
| HECW2       | 57520          | -0.790180014                             | -0.844634808                             |
| NLRC5       | 84166          | -0.709693984                             | -0.854468288                             |
| PARC        | 23113          | -1.265128674                             | -0.861149962                             |
| RNF20       | 56254          | -0.604183664                             | -0.861149962                             |
| FBXO9       | 26268          | -0.314658803                             | -0.871369105                             |
| NEURL2      | 140825         | -0.627507036                             | -0.871369105                             |
| ZMYND11     | 10771          | -0.563565884                             | -0.871369105                             |
| PJA1        | 64219          | -1.022462267                             | -0.874829521                             |
| RNF24       | 11237          | -0.731970156                             | -0.881834515                             |
| LOC646754   | 646754         | -0.322007463                             | -0.885379676                             |

| Gene Symbol | Entrez Gene ID | Log10 fold over<br>Control (Replicate 1) | Log10 fold over<br>Control (Replicate 2) |
|-------------|----------------|------------------------------------------|------------------------------------------|
| ASB7        | 140460         | -0.558426138                             | -0.885379676                             |
| ISL1        | 3670           | -1.347966022                             | -0.888954352                             |
| CNOT4       | 4850           | -0.674931792                             | -0.892558355                             |
| UBE2E1      | 7324           | -0.798092402                             | -0.899857692                             |
| WSB2        | 55884          | -0.759491438                             | -0.899857692                             |
| PHF21B      | 112885         | -0.423387099                             | -0.911041835                             |
| UBE3B       | 89910          | -0.297513457                             | -0.911041835                             |
| TRIM61      | 391712         | -0.65533623                              | -0.93034707                              |
| RFPL4B      | 442247         | -1.148393682                             | -0.934313125                             |
| ASB14       | 142686         | -0.818528293                             | -0.938315733                             |
| UEVLD       | 55293          | -0.845380684                             | -0.94643373                              |
| ASB11       | 140456         | -1.421519182                             | -0.954706366                             |
| FBXL12      | 54850          | -0.425263085                             | -0.967418305                             |
| ZNRF3       | 84133          | -0.901820577                             | -0.967418305                             |
| UBE1C       | 9039           | -0.481379079                             | -0.967418305                             |
| LOC92312    | 92312          | -0.077912027                             | -0.971739534                             |
| CUL4A       | 8451           | -0.444482834                             | -0.972173949                             |
| LOC440456   | 440456         | -0.571391144                             | -0.983626956                             |
| RNF215      | 200312         | -0.743552149                             | -0.993559203                             |
| TRIM67      | 440730         | -0.83366848                              | -0.997228077                             |
| PXMP3       | 5828           | -1.031479087                             | -1.011268831                             |
| FBXO21      | 23014          | -0.971309617                             | -1.012221199                             |
| C1orf166    | 79594          | 0.248152836                              | -1.022349591                             |
| ITCH        | 83737          | -0.545837137                             | -1.032719843                             |
| FBXL6       | 26233          | -1.100455313                             | -1.043856167                             |
| CUL2        | 8453           | -1.24729584                              | -1.08864623                              |
| LINCR       | 93082          | -0.856908971                             | -1.089215085                             |
| UBE2T       | 29089          | -1.160486192                             | -1.096678324                             |
| PHF12       | 57649          | -0.79987046                              | -1.119259615                             |
| RNF170      | 81790          | -0.627507036                             | -1.12109337                              |
| RNF25       | 64320          | -0.728177206                             | -1.124784271                             |
| UBE2L6      | 9246           | -0.865113041                             | -1.127884127                             |
| TRIM8       | 81603          | -0.988845867                             | -1.134782815                             |
| SHFM3       | 6468           | -0.555878975                             | -1.139869786                             |
| DTX1        | 1840           | -0.460495466                             | -1.145664804                             |
| PHF13       | 148479         | -1.47500783                              | -1.1469631                               |
| ANKIB1      | 54467          | -1.324982156                             | -1.147613707                             |
| ZNF547      | 284306         | -0.923179032                             | -1.15815863                              |
| LONRF2      | 164832         | -1.178214975                             | -1.171710249                             |
| RBBP6       | 5930           | -0.966706955                             | -1.18286451                              |
| MARCH1      | 55016          | -1.023206552                             | -1.21434357                              |
| FLJ31951    | 153830         | -1.109447204                             | -1.21434357                              |
| LONRF1      | 91694          | -0.871369428                             | -1.238542326                             |
| TRIM11      | 81559          | -1.120489186                             | -1.240150847                             |
| UBE2F       | 140739         | -0.658541338                             | -1.285103345                             |
| MEFV        | 4210           | -1.08045422                              | -1.291404058                             |
| DPF1        | 8193           | -1.354306234                             | -1.312774705                             |
| UBE2V1      | 7335           | -0.822733395                             | -1.330265486                             |
| HBXAP       | 51773          | -0.590217977                             | -1.402365685                             |
| RNF2        | 6045           | -1.421519182                             | -1.442822915                             |
| CBLB        | 868            | -1.07875772                              | -1.478979139                             |
| PHF14       | 9678           | -1.251056028                             | -1.486018128                             |
| LOC729974   | 729974         | -1.276991742                             | -1.533989066                             |
| FLJ25076    | 134111         | -1.15138536                              | -1.749023092                             |
